# Supplementary material for: Rapid regulation of vesicle priming explains synaptic facilitation despite heterogeneous vesicle:Ca2+ channel distances
Source: eLife. 2020 Feb 20;9:e51032. doi: 10.7554/eLife.51032 (PMC7145420; doi:10.7554/eLife.51032)
Supplement: Figure 1—source data 1. [file elife-51032-fig1-data1.xlsx]

## Sheet: Figure 1B
Figure 1B - source data
Distance obervations (nm)
22
39
39
47
49
52
54
57
86
89
95
101
115
136
143
144
156
167
214

## Sheet: Figure 1F
Figure 1F - source data
Distance (center of picture to center of pixel, nm)	Fluorescence intensity (normalized)
0	0.00083715
10	0.000794061
10	0.000849461
10	0.000867927
10	0.000874083
14.1421	0.000818683
14.1421	0.000849461
14.1421	0.00090486
14.1421	0.000898705
20	0.000818683
20	0.000911016
20	0.000947949
20	0.000917171
22.3607	0.000843305
22.3607	0.000867927
22.3607	0.000867927
22.3607	0.000947949
22.3607	0.000984882
22.3607	0.000954104
22.3607	0.000954104
22.3607	0.000929482
28.2843	0.000898705
28.2843	0.000966416
28.2843	0.00104028
28.2843	0.000972571
30	0.000911016
30	0.000997193
30	0.0010649
30	0.000972571
31.6228	0.000923327
31.6228	0.000947949
31.6228	0.000978727
31.6228	0.00108953
31.6228	0.00107106
31.6228	0.00104028
31.6228	0.00100335
31.6228	0.000978727
36.0555	0.000966416
36.0555	0.00103413
36.0555	0.000991038
36.0555	0.00109568
36.0555	0.00112646
36.0555	0.00103413
36.0555	0.00107721
36.0555	0.00103413
40	0.00103413
40	0.0011203
40	0.00118186
40	0.00107106
41.2311	0.00104028
41.2311	0.00107106
41.2311	0.00110799
41.2311	0.00120648
41.2311	0.00114493
41.2311	0.00113877
41.2311	0.00109568
41.2311	0.00108337
42.4264	0.00104028
42.4264	0.00112646
42.4264	0.00118186
42.4264	0.00108953
44.7214	0.00107721
44.7214	0.00113261
44.7214	0.0011203
44.7214	0.00119417
44.7214	0.00118801
44.7214	0.00112646
44.7214	0.00115108
44.7214	0.00113261
50	0.00119417
50	0.00113261
50	0.00118801
50	0.00113877
50	0.00120648
50	0.00122495
50	0.00129266
50	0.00126188
50	0.00115724
50	0.00124341
50	0.00118186
50	0.00120033
50.9902	0.00118801
50.9902	0.00123726
50.9902	0.00123726
50.9902	0.00130497
50.9902	0.00124341
50.9902	0.00126188
50.9902	0.00122495
50.9902	0.00120648
53.8516	0.00120648
53.8516	0.00128035
53.8516	0.00123726
53.8516	0.0012865
53.8516	0.00128035
53.8516	0.00123726
53.8516	0.00127419
53.8516	0.00124957
56.5685	0.00119417
56.5685	0.00124341
56.5685	0.00132344
56.5685	0.00122495
58.3095	0.0012311
58.3095	0.00130497
58.3095	0.00122495
58.3095	0.00127419
58.3095	0.0013419
58.3095	0.00124957
58.3095	0.00132959
58.3095	0.00129881
60	0.0013419
60	0.00133575
60	0.00138499
60	0.00131728
60.8276	0.00131112
60.8276	0.0013973
60.8276	0.00135421
60.8276	0.00138499
60.8276	0.00133575
60.8276	0.00135421
60.8276	0.0013419
60.8276	0.00131728
63.2456	0.00131112
63.2456	0.00142192
63.2456	0.00133575
63.2456	0.0013419
63.2456	0.00136652
63.2456	0.00131112
63.2456	0.00137268
63.2456	0.00136037
64.0312	0.00126804
64.0312	0.0013419
64.0312	0.00124957
64.0312	0.00131112
64.0312	0.00139115
64.0312	0.0012865
64.0312	0.00139115
64.0312	0.00132959
67.082	0.00131728
67.082	0.00141577
67.082	0.00129266
67.082	0.00131112
67.082	0.00140961
67.082	0.0012865
67.082	0.0013973
67.082	0.00141577
70	0.00147117
70	0.00144655
70	0.00144655
70	0.00141577
70.7107	0.00141577
70.7107	0.00152041
70.7107	0.00131728
70.7107	0.00138499
70.7107	0.00144655
70.7107	0.00143423
70.7107	0.00144039
70.7107	0.00140346
70.7107	0.00144655
70.7107	0.00137268
70.7107	0.00143423
70.7107	0.00144039
72.111	0.00134806
72.111	0.00142808
72.111	0.00129881
72.111	0.00133575
72.111	0.00144039
72.111	0.00131112
72.111	0.00143423
72.111	0.00144655
72.8011	0.00138499
72.8011	0.00153272
72.8011	0.00140346
72.8011	0.00137883
72.8011	0.00144039
72.8011	0.00134806
72.8011	0.00144655
72.8011	0.00148348
76.1577	0.00137883
76.1577	0.00150195
76.1577	0.00134806
76.1577	0.00133575
76.1577	0.00144655
76.1577	0.00131112
76.1577	0.00144655
76.1577	0.00152041
78.1025	0.00137883
78.1025	0.00144039
78.1025	0.0013419
78.1025	0.00139115
78.1025	0.00146501
78.1025	0.00136652
78.1025	0.00146501
78.1025	0.00144655
80	0.00151426
80	0.00153888
80	0.00143423
80	0.00148348
80.6226	0.00145886
80.6226	0.00155734
80.6226	0.00140346
80.6226	0.00146501
80.6226	0.00132344
80.6226	0.00132344
80.6226	0.00151426
80.6226	0.00142192
80.6226	0.0015081
80.6226	0.00140346
80.6226	0.0014527
80.6226	0.00130497
80.6226	0.00144039
80.6226	0.00152657
80.6226	0.00147117
80.6226	0.00151426
82.4621	0.00140346
82.4621	0.0015635
82.4621	0.00143423
82.4621	0.00136652
82.4621	0.00146501
82.4621	0.0013419
82.4621	0.00145886
82.4621	0.0015635
84.8528	0.00139115
84.8528	0.00141577
84.8528	0.00146501
84.8528	0.00140346
85.44	0.00137883
85.44	0.00152657
85.44	0.0013419
85.44	0.00131728
85.44	0.00144655
85.44	0.0012865
85.44	0.00143423
85.44	0.00156966
86.0233	0.00142192
86.0233	0.00143423
86.0233	0.0013419
86.0233	0.00135421
86.0233	0.0014527
86.0233	0.00132959
86.0233	0.00144655
86.0233	0.00147732
89.4427	0.00137883
89.4427	0.0014527
89.4427	0.00129881
89.4427	0.0012865
89.4427	0.00143423
89.4427	0.00126188
89.4427	0.00140346
89.4427	0.00152657
90	0.00148348
90	0.00151426
90	0.00138499
90	0.0014527
90.5539	0.00142808
90.5539	0.0015081
90.5539	0.00149579
90.5539	0.00137268
90.5539	0.00148348
90.5539	0.00134806
90.5539	0.00142192
90.5539	0.00148963
92.1954	0.00138499
92.1954	0.00149579
92.1954	0.00141577
92.1954	0.00138499
92.1954	0.00136652
92.1954	0.00136652
92.1954	0.00140346
92.1954	0.00131728
92.1954	0.00144039
92.1954	0.0012865
92.1954	0.00142192
92.1954	0.00131728
92.1954	0.00142192
92.1954	0.00137883
92.1954	0.00137883
92.1954	0.00153888
94.3398	0.00140346
94.3398	0.00137883
94.3398	0.0012865
94.3398	0.00129266
94.3398	0.00140961
94.3398	0.00125572
94.3398	0.00138499
94.3398	0.00144039
94.8683	0.00134806
94.8683	0.0014527
94.8683	0.00131112
94.8683	0.00126188
94.8683	0.00140346
94.8683	0.00121879
94.8683	0.0013419
94.8683	0.00154503
98.4886	0.00133575
98.4886	0.00137268
98.4886	0.00125572
98.4886	0.00122495
98.4886	0.00137268
98.4886	0.0011757
98.4886	0.00130497
98.4886	0.00147117
98.9949	0.00136652
98.9949	0.00132959
98.9949	0.00137883
98.9949	0.00124957
100	0.00136037
100	0.0013973
100	0.00131112
100	0.00128035
100	0.00129266
100	0.00136652
100	0.00123726
100	0.00137268
100	0.00122495
100	0.00137268
100	0.00129881
100	0.00129881
100.499	0.0013419
100.499	0.00135421
100.499	0.0013419
100.499	0.00123726
100.499	0.00134806
100.499	0.00120648
100.499	0.00126804
100.499	0.00132344
101.98	0.00131112
101.98	0.00133575
101.98	0.00128035
101.98	0.00120033
101.98	0.00131728
101.98	0.00115108
101.98	0.0012311
101.98	0.00137883
102.956	0.00134806
102.956	0.00128035
102.956	0.00122495
102.956	0.00120033
102.956	0.00133575
102.956	0.00113877
102.956	0.00129266
102.956	0.00134806
104.403	0.00129266
104.403	0.0012865
104.403	0.00121264
104.403	0.00113877
104.403	0.0012865
104.403	0.00109568
104.403	0.00119417
104.403	0.0013973
106.301	0.00132959
106.301	0.00124341
106.301	0.00126188
106.301	0.00125572
106.301	0.00131728
106.301	0.00113877
106.301	0.0013419
106.301	0.00116955
107.703	0.00127419
107.703	0.00121879
107.703	0.00115108
107.703	0.00109568
107.703	0.00125572
107.703	0.00104644
107.703	0.0011757
107.703	0.00132344
108.167	0.00133575
108.167	0.00120033
108.167	0.00118801
108.167	0.0011757
108.167	0.00128035
108.167	0.00108953
108.167	0.00130497
108.167	0.00120033
110	0.00115724
110	0.00116339
110	0.00105875
110	0.00108953
110.454	0.00116955
110.454	0.00113877
110.454	0.00114493
110.454	0.00105259
110.454	0.00115724
110.454	0.00104028
110.454	0.00105875
110.454	0.0011203
111.803	0.00118801
111.803	0.0011203
111.803	0.00126804
111.803	0.00114493
111.803	0.00110184
111.803	0.00105875
111.803	0.00110799
111.803	0.00102182
111.803	0.00115108
111.803	0.00100335
111.803	0.00121879
111.803	0.000984882
111.803	0.00118801
111.803	0.00120648
111.803	0.00103413
111.803	0.00115724
113.137	0.00120648
113.137	0.0011757
113.137	0.00127419
113.137	0.00104644
114.018	0.00119417
114.018	0.00108337
114.018	0.00126188
114.018	0.0011203
114.018	0.00113877
114.018	0.00113877
114.018	0.00105875
114.018	0.000966416
114.018	0.00113877
114.018	0.000954104
114.018	0.00121264
114.018	0.00100335
114.018	0.00129266
114.018	0.00107106
114.018	0.00100335
114.018	0.00116339
116.619	0.00123726
116.619	0.0010649
116.619	0.00104644
116.619	0.00100335
116.619	0.00113877
116.619	0.000917171
116.619	0.00121264
116.619	0.00108337
117.047	0.00119417
117.047	0.00103413
117.047	0.0010095
117.047	0.000923327
117.047	0.0011203
117.047	0.00090486
117.047	0.00100335
117.047	0.00110799
120	0.000947949
120	0.000941793
120	0.000861772
120	0.000886394
120.416	0.000984882
120.416	0.000923327
120.416	0.00113261
120.416	0.00104028
120.416	0.00107106
120.416	0.0010649
120.416	0.000923327
120.416	0.00083715
120.416	0.000954104
120.416	0.000867927
120.416	0.00114493
120.416	0.000917171
120.416	0.00121264
120.416	0.000966416
120.416	0.000855616
120.416	0.00090486
120.83	0.00116955
120.83	0.000978727
120.83	0.00096026
120.83	0.000892549
120.83	0.00107721
120.83	0.000830994
120.83	0.00103413
120.83	0.00101566
121.655	0.00101566
121.655	0.000911016
121.655	0.00090486
121.655	0.000800217
121.655	0.000947949
121.655	0.000861772
121.655	0.00083715
121.655	0.000929482
122.066	0.00115724
122.066	0.000984882
122.066	0.000978727
122.066	0.000954104
122.066	0.00104028
122.066	0.000843305
122.066	0.00119417
122.066	0.000972571
123.693	0.00105259
123.693	0.000886394
123.693	0.000886394
123.693	0.000775595
123.693	0.00096026
123.693	0.000824839
123.693	0.000818683
123.693	0.000929482
125.3	0.0011203
125.3	0.000911016
125.3	0.000898705
125.3	0.00083715
125.3	0.000991038
125.3	0.000757128
125.3	0.00105875
125.3	0.000929482
126.491	0.0010649
126.491	0.000861772
126.491	0.000849461
126.491	0.000750973
126.491	0.000954104
126.491	0.000769439
126.491	0.000824839
126.491	0.000886394
127.279	0.000991038
127.279	0.000947949
127.279	0.00107106
127.279	0.000843305
128.062	0.00104028
128.062	0.000911016
128.062	0.000917171
128.062	0.00090486
128.062	0.00096026
128.062	0.000775595
128.062	0.00110184
128.062	0.000874083
130	0.000775595
130	0.00104028
130	0.000824839
130	0.000800217
130	0.000726351
130	0.000757128
130	0.000664795
130	0.000923327
130	0.000695573
130	0.000861772
130	0.000824839
130	0.000720195
130.384	0.000806372
130.384	0.000763284
130.384	0.00102182
130.384	0.000824839
130.384	0.000830994
130.384	0.000794061
130.384	0.000738662
130.384	0.000627862
130.384	0.000775595
130.384	0.000695573
130.384	0.000886394
130.384	0.000707884
130.384	0.00102182
130.384	0.000843305
130.384	0.000707884
130.384	0.000726351
131.529	0.000824839
131.529	0.000738662
131.529	0.000732506
131.529	0.000590929
131.529	0.000775595
131.529	0.000707884
131.529	0.000689417
131.529	0.000732506
133.417	0.000843305
133.417	0.000720195
133.417	0.000720195
133.417	0.000584774
133.417	0.000794061
133.417	0.000695573
133.417	0.000677106
133.417	0.000720195
134.164	0.000972571
134.164	0.000769439
134.164	0.000738662
134.164	0.000683262
134.164	0.000843305
134.164	0.000634018
134.164	0.000867927
134.164	0.000763284
134.536	0.000898705
134.536	0.000824839
134.536	0.000843305
134.536	0.000830994
134.536	0.000867927
134.536	0.000720195
134.536	0.000947949
134.536	0.000769439
136.015	0.000855616
136.015	0.000707884
136.015	0.000892549
136.015	0.000750973
136.015	0.000769439
136.015	0.000757128
136.015	0.000701728
136.015	0.000566307
136.015	0.000787906
136.015	0.000646329
136.015	0.000787906
136.015	0.000664795
136.015	0.000917171
136.015	0.000757128
136.015	0.000683262
136.015	0.000689417
138.924	0.000874083
138.924	0.000701728
138.924	0.000683262
138.924	0.000652484
138.924	0.000750973
138.924	0.000590929
138.924	0.000824839
138.924	0.000695573
139.284	0.00083715
139.284	0.000689417
139.284	0.000670951
139.284	0.000541685
139.284	0.000763284
139.284	0.000584774
139.284	0.000707884
139.284	0.000640173
140	0.000621707
140	0.000609396
140	0.000504752
140	0.000584774
140.357	0.000634018
140.357	0.000609396
140.357	0.000584774
140.357	0.000473974
140.357	0.000646329
140.357	0.000541685
140.357	0.000572463
140.357	0.000584774
141.421	0.000640173
141.421	0.000590929
141.421	0.000763284
141.421	0.000726351
141.421	0.000578618
141.421	0.000455508
141.421	0.000652484
141.421	0.000566307
141.421	0.000757128
141.421	0.000670951
141.421	0.000553996
141.421	0.000572463
142.127	0.000757128
142.127	0.000670951
142.127	0.000714039
142.127	0.000701728
142.127	0.000689417
142.127	0.000627862
142.127	0.000787906
142.127	0.000677106
143.178	0.000646329
143.178	0.000590929
143.178	0.000794061
143.178	0.000640173
143.178	0.000621707
143.178	0.000510908
143.178	0.000590929
143.178	0.000449352
143.178	0.000646329
143.178	0.000560152
143.178	0.000714039
143.178	0.000529374
143.178	0.000695573
143.178	0.000590929
143.178	0.00053553
143.178	0.000560152
144.222	0.000744817
144.222	0.000627862
144.222	0.000646329
144.222	0.000621707
144.222	0.000646329
144.222	0.000572463
144.222	0.000720195
144.222	0.000615551
145.602	0.000652484
145.602	0.000584774
145.602	0.000590929
145.602	0.000430886
145.602	0.000627862
145.602	0.00053553
145.602	0.00053553
145.602	0.000529374
147.648	0.000714039
147.648	0.000572463
147.648	0.000578618
147.648	0.000492441
147.648	0.000634018
147.648	0.000492441
147.648	0.000646329
147.648	0.000541685
148.661	0.000646329
148.661	0.000566307
148.661	0.000640173
148.661	0.000597085
148.661	0.000627862
148.661	0.000615551
148.661	0.000578618
148.661	0.000412419
148.661	0.000597085
148.661	0.000492441
148.661	0.000584774
148.661	0.000584774
148.661	0.000621707
148.661	0.000590929
148.661	0.000553996
148.661	0.000492441
150	0.000498597
150	0.000621707
150	0.000553996
150	0.000590929
150	0.000572463
150	0.00048013
150	0.000369331
150	0.000547841
150	0.000541685
150	0.000609396
150	0.000553996
150	0.000467819
150.333	0.000504752
150.333	0.000473974
150.333	0.000455508
150.333	0.000344709
150.333	0.000510908
150.333	0.000400108
150.333	0.000455508
150.333	0.000473974
151.327	0.000498597
151.327	0.000467819
151.327	0.000455508
151.327	0.000332398
151.327	0.000517063
151.327	0.000430886
151.327	0.000430886
151.327	0.000473974
152.315	0.000627862
152.315	0.000517063
152.315	0.000529374
152.315	0.000393953
152.315	0.000547841
152.315	0.000449352
152.315	0.00053553
152.315	0.000461663
152.643	0.00060324
152.643	0.000504752
152.643	0.000541685
152.643	0.000467819
152.643	0.00053553
152.643	0.000473974
152.643	0.000566307
152.643	0.000486286
152.971	0.000473974
152.971	0.000455508
152.971	0.000467819
152.971	0.000332398
152.971	0.000517063
152.971	0.000437041
152.971	0.000418575
152.971	0.000449352
155.242	0.000467819
155.242	0.000443197
155.242	0.00048013
155.242	0.000326242
155.242	0.000504752
155.242	0.000437041
155.242	0.00042473
155.242	0.00042473
155.563	0.000517063
155.563	0.000498597
155.563	0.00048013
155.563	0.000510908
156.205	0.000517063
156.205	0.00048013
156.205	0.000523219
156.205	0.000504752
156.205	0.000449352
156.205	0.000498597
156.205	0.00048013
156.205	0.000486286
156.525	0.000572463
156.525	0.000455508
156.525	0.00048013
156.525	0.000381642
156.525	0.000473974
156.525	0.00042473
156.525	0.000498597
156.525	0.00042473
158.114	0.000473974
158.114	0.000430886
158.114	0.000492441
158.114	0.000443197
158.114	0.000510908
158.114	0.000430886
158.114	0.000461663
158.114	0.000320087
158.114	0.000473974
158.114	0.000418575
158.114	0.000449352
158.114	0.000443197
158.114	0.000467819
158.114	0.000437041
158.114	0.00042473
158.114	0.000381642
160	0.000400108
160	0.000369331
160	0.000264687
160	0.000369331
160.312	0.000412419
160.312	0.000381642
160.312	0.000363175
160.312	0.000240065
160.312	0.000375486
160.312	0.000283154
160.312	0.00035702
160.312	0.000375486
161.245	0.000400108
161.245	0.000369331
161.245	0.000492441
161.245	0.000387797
161.245	0.000449352
161.245	0.00035702
161.245	0.00035702
161.245	0.000227754
161.245	0.000381642
161.245	0.000313931
161.245	0.000406264
161.245	0.000406264
161.245	0.000443197
161.245	0.000393953
161.245	0.000332398
161.245	0.000369331
161.555	0.000455508
161.555	0.000400108
161.555	0.00042473
161.555	0.000320087
161.555	0.00042473
161.555	0.000387797
161.555	0.000406264
161.555	0.00035702
162.788	0.000375486
162.788	0.00035702
162.788	0.000412419
162.788	0.000400108
162.788	0.000437041
162.788	0.000406264
162.788	0.000369331
162.788	0.000233909
162.788	0.000381642
162.788	0.000326242
162.788	0.000375486
162.788	0.000418575
162.788	0.000375486
162.788	0.000418575
162.788	0.000320087
162.788	0.000363175
164.012	0.000406264
164.012	0.000381642
164.012	0.000467819
164.012	0.000375486
164.012	0.00035702
164.012	0.000387797
164.012	0.000369331
164.012	0.000387797
164.924	0.000363175
164.924	0.000350864
164.924	0.000375486
164.924	0.000246221
164.924	0.000381642
164.924	0.000326242
164.924	0.000326242
164.924	0.000326242
165.529	0.000430886
165.529	0.00035702
165.529	0.000381642
165.529	0.00030162
165.529	0.000369331
165.529	0.000369331
165.529	0.000369331
165.529	0.000326242
166.433	0.000406264
166.433	0.000338553
166.433	0.000430886
166.433	0.000307776
166.433	0.000350864
166.433	0.000363175
166.433	0.000363175
166.433	0.00035702
167.631	0.00035702
167.631	0.000338553
167.631	0.00035702
167.631	0.000252376
167.631	0.00035702
167.631	0.000320087
167.631	0.000326242
167.631	0.000289309
169.706	0.00035702
169.706	0.000332398
169.706	0.000307776
169.706	0.000344709
170	0.000313931
170	0.000381642
170	0.00030162
170	0.00035702
170	0.000264687
170	0.000276998
170	0.000190821
170	0.000326242
170	0.000332398
170	0.000332398
170	0.00030162
170	0.000295465
170.294	0.000326242
170.294	0.00030162
170.294	0.000338553
170.294	0.000326242
170.294	0.000387797
170.294	0.000313931
170.294	0.000276998
170.294	0.000166199
170.294	0.000270843
170.294	0.000215443
170.294	0.00030162
170.294	0.000307776
170.294	0.000289309
170.294	0.000332398
170.294	0.000270843
170.294	0.00030162
170.88	0.000350864
170.88	0.000313931
170.88	0.000326242
170.88	0.000246221
170.88	0.000326242
170.88	0.00030162
170.88	0.000307776
170.88	0.000264687
171.172	0.000313931
171.172	0.000289309
171.172	0.000270843
171.172	0.000160043
171.172	0.000270843
171.172	0.000240065
171.172	0.000258532
171.172	0.000295465
172.047	0.000332398
172.047	0.000295465
172.047	0.000393953
172.047	0.000270843
172.047	0.000295465
172.047	0.000289309
172.047	0.000289309
172.047	0.00030162
172.627	0.000289309
172.627	0.000276998
172.627	0.000276998
172.627	0.000166199
172.627	0.000264687
172.627	0.000252376
172.627	0.000252376
172.627	0.000289309
174.642	0.000283154
174.642	0.000283154
174.642	0.000332398
174.642	0.000270843
174.642	0.000289309
174.642	0.000227754
174.642	0.000283154
174.642	0.00017851
174.642	0.000264687
174.642	0.000246221
174.642	0.000295465
174.642	0.000283154
174.642	0.000276998
174.642	0.000240065
174.642	0.000252376
174.642	0.000270843
174.929	0.000326242
174.929	0.000264687
174.929	0.000332398
174.929	0.000221598
174.929	0.000289309
174.929	0.000289309
174.929	0.000289309
174.929	0.000258532
176.918	0.000295465
176.918	0.000270843
176.918	0.000320087
176.918	0.000252376
176.918	0.000252376
176.918	0.000233909
176.918	0.000240065
176.918	0.000264687
177.2	0.000270843
177.2	0.000283154
177.2	0.000264687
177.2	0.000190821
177.2	0.000258532
177.2	0.000246221
177.2	0.000246221
177.2	0.000240065
178.045	0.000283154
178.045	0.000258532
178.045	0.000332398
178.045	0.000227754
178.045	0.000264687
178.045	0.000215443
178.045	0.000215443
178.045	0.000252376
178.885	0.00030162
178.885	0.000227754
178.885	0.000258532
178.885	0.000190821
178.885	0.000264687
178.885	0.000252376
178.885	0.000246221
178.885	0.000215443
180	0.000246221
180	0.000215443
180	0.000141577
180	0.000240065
180.278	0.000258532
180.278	0.000221598
180.278	0.000264687
180.278	0.000258532
180.278	0.000270843
180.278	0.000233909
180.278	0.000307776
180.278	0.000184665
180.278	0.000240065
180.278	0.000190821
180.278	0.000221598
180.278	0.00012311
180.278	0.000196976
180.278	0.000160043
180.278	0.000246221
180.278	0.000240065
180.278	0.000252376
180.278	0.000227754
180.278	0.000240065
180.278	0.000215443
180.278	0.000227754
180.278	0.000209287
180.278	0.000221598
180.278	0.000246221
181.108	0.000246221
181.108	0.000221598
181.108	0.000215443
181.108	0.000116955
181.108	0.00017851
181.108	0.00017851
181.108	0.000209287
181.108	0.000240065
182.483	0.000215443
182.483	0.000215443
182.483	0.000215443
182.483	0.00012311
182.483	0.000172354
182.483	0.00017851
182.483	0.000203132
182.483	0.000227754
183.576	0.000258532
183.576	0.000196976
183.576	0.000246221
183.576	0.000160043
183.576	0.000233909
183.576	0.000215443
183.576	0.000215443
183.576	0.000184665
183.848	0.000246221
183.848	0.000209287
183.848	0.000264687
183.848	0.000209287
183.848	0.000203132
183.848	0.00017851
183.848	0.000233909
183.848	0.000221598
183.848	0.000203132
183.848	0.00017851
183.848	0.000203132
183.848	0.00017851
184.391	0.000209287
184.391	0.000233909
184.391	0.000258532
184.391	0.000221598
184.391	0.000276998
184.391	0.000190821
184.391	0.000215443
184.391	0.000129266
184.391	0.000184665
184.391	0.00017851
184.391	0.000233909
184.391	0.000153888
184.391	0.00017851
184.391	0.000203132
184.391	0.000190821
184.391	0.000209287
186.011	0.000233909
186.011	0.000209287
186.011	0.000258532
186.011	0.000166199
186.011	0.000240065
186.011	0.000160043
186.011	0.00017851
186.011	0.000184665
186.815	0.000209287
186.815	0.000233909
186.815	0.000203132
186.815	0.000135421
186.815	0.000190821
186.815	0.00017851
186.815	0.00017851
186.815	0.000190821
187.883	0.000233909
187.883	0.000160043
187.883	0.000184665
187.883	0.000153888
187.883	0.000215443
187.883	0.000190821
187.883	0.000184665
187.883	0.000153888
188.68	0.000215443
188.68	0.00017851
188.68	0.000233909
188.68	0.000141577
188.68	0.000215443
188.68	0.000160043
188.68	0.00017851
188.68	0.000153888
189.737	0.000190821
189.737	0.000215443
189.737	0.000172354
189.737	0.000141577
189.737	0.000190821
189.737	0.00017851
189.737	0.000166199
189.737	0.000172354
190	0.000196976
190	0.000160043
190	0.000116955
190	0.000190821
190.263	0.000203132
190.263	0.000190821
190.263	0.000166199
190.263	0.000104644
190.263	0.000141577
190.263	0.000129266
190.263	0.000172354
190.263	0.000196976
191.05	0.000190821
191.05	0.000184665
191.05	0.000240065
191.05	0.000184665
191.05	0.000221598
191.05	0.000153888
191.05	0.000153888
191.05	9.84882e-05
191.05	0.000129266
191.05	0.000135421
191.05	0.000196976
191.05	0.00012311
191.05	0.000147732
191.05	0.000147732
191.05	0.000160043
191.05	0.000184665
192.094	0.000227754
192.094	0.000184665
192.094	0.000215443
192.094	0.000153888
192.094	0.000215443
192.094	0.000110799
192.094	0.000147732
192.094	0.000160043
192.354	0.000166199
192.354	0.000196976
192.354	0.000209287
192.354	0.000141577
192.354	0.00017851
192.354	0.000129266
192.354	0.000141577
192.354	9.84882e-05
192.354	0.000129266
192.354	0.00012311
192.354	0.000190821
192.354	0.000147732
192.354	0.000160043
192.354	0.00012311
192.354	0.000147732
192.354	0.000172354
193.132	0.00017851
193.132	0.00017851
193.132	0.000147732
193.132	0.000141577
193.132	0.000184665
193.132	0.000172354
193.132	0.000147732
193.132	0.000147732
194.165	0.000160043
194.165	0.000209287
194.165	0.000190821
194.165	0.000172354
194.165	0.000196976
194.165	0.000129266
194.165	0.000141577
194.165	0.000104644
194.165	0.000135421
194.165	0.00012311
194.165	0.000215443
194.165	0.00012311
194.165	0.000135421
194.165	0.000129266
194.165	0.000135421
194.165	0.000160043
196.469	0.000153888
196.469	0.000209287
196.469	0.000141577
196.469	0.000110799
196.469	0.000147732
196.469	0.000135421
196.469	0.00012311
196.469	0.000147732
196.977	0.000166199
196.977	0.000135421
196.977	0.000129266
196.977	0.00012311
196.977	0.00017851
196.977	0.000141577
196.977	0.000141577
196.977	0.000116955
197.231	0.000184665
197.231	0.000135421
197.231	0.00017851
197.231	0.000116955
197.231	0.00017851
197.231	0.00012311
197.231	0.000141577
197.231	9.84882e-05
197.99	0.000203132
197.99	0.000135421
197.99	0.000147732
197.99	0.00012311
198.494	0.000221598
198.494	0.000160043
198.494	0.000172354
198.494	0.000129266
198.494	0.000190821
198.494	9.84882e-05
198.494	0.00012311
198.494	0.000129266
199.249	0.000147732
199.249	0.000190821
199.249	0.000129266
199.249	0.000110799
199.249	0.000153888
199.249	0.000135421
199.249	0.000110799
199.249	0.000135421
200	0.000160043
200	0.000196976
200	0.000160043
200	0.000166199
200	0.000116955
200	0.000110799
200	9.84882e-05
200	0.000196976
200	9.84882e-05
200	0.000104644
200	0.00012311
200	0.000153888
200.25	0.000160043
200.25	0.000160043
200.25	0.000110799
200.25	9.23327e-05
200.25	0.000104644
200.25	0.000104644
200.25	0.000135421
200.25	0.000153888
200.998	0.000147732
200.998	0.000160043
200.998	9.84882e-05
200.998	8.00217e-05
200.998	0.000104644
200.998	0.000104644
200.998	0.00012311
200.998	0.000141577
201.246	0.000160043
201.246	0.000129266
201.246	0.000129266
201.246	0.000110799
201.246	0.000160043
201.246	0.000116955
201.246	0.000135421
201.246	9.23327e-05
202.237	0.000129266
202.237	0.000166199
202.237	9.23327e-05
202.237	7.38662e-05
202.237	0.000104644
202.237	8.61772e-05
202.237	0.000110799
202.237	0.000135421
202.485	0.000141577
202.485	0.000153888
202.485	0.000172354
202.485	0.000141577
202.485	0.000153888
202.485	0.000104644
202.485	0.000116955
202.485	0.000104644
202.485	0.000147732
202.485	0.000129266
202.485	0.000172354
202.485	0.000104644
202.485	0.000116955
202.485	8.61772e-05
202.485	0.000110799
202.485	0.000116955
203.961	0.00012311
203.961	0.00017851
203.961	9.23327e-05
203.961	7.38662e-05
203.961	0.000110799
203.961	8.61772e-05
203.961	9.84882e-05
203.961	0.000129266
205.183	0.000190821
205.183	0.000110799
205.183	0.000160043
205.183	0.000110799
205.183	0.000135421
205.183	9.84882e-05
205.183	0.00012311
205.183	0.00012311
205.913	0.000160043
205.913	0.00012311
205.913	0.00012311
205.913	9.84882e-05
205.913	0.000147732
205.913	0.000104644
205.913	0.000116955
205.913	6.77106e-05
206.155	0.00012311
206.155	0.00017851
206.155	0.000135421
206.155	0.000129266
206.155	0.000196976
206.155	0.000141577
206.155	0.000141577
206.155	9.84882e-05
206.155	0.000104644
206.155	9.23327e-05
206.155	0.000104644
206.155	8.00217e-05
206.155	0.00012311
206.155	9.84882e-05
206.155	0.000135421
206.155	0.000104644
206.155	0.000172354
206.155	9.23327e-05
206.155	9.23327e-05
206.155	0.000116955
206.155	0.000110799
206.155	9.23327e-05
206.155	8.61772e-05
206.155	0.00012311
208.087	0.00017851
208.087	0.000141577
208.087	0.000135421
208.087	9.84882e-05
208.087	0.000141577
208.087	9.23327e-05
208.087	9.23327e-05
208.087	9.23327e-05
208.806	0.00012311
208.806	0.000160043
208.806	0.000104644
208.806	8.00217e-05
208.806	0.00012311
208.806	9.84882e-05
208.806	8.00217e-05
208.806	0.000104644
210	0.000141577
210	8.61772e-05
210	8.00217e-05
210	0.000110799
210.238	0.000135421
210.238	0.000135421
210.238	0.000135421
210.238	0.000116955
210.238	9.84882e-05
210.238	8.61772e-05
210.238	8.00217e-05
210.238	7.38662e-05
210.238	9.23327e-05
210.238	8.61772e-05
210.238	0.000129266
210.238	9.23327e-05
210.238	0.000104644
210.238	8.00217e-05
210.238	9.84882e-05
210.238	0.000116955
210.95	0.000129266
210.95	0.000135421
210.95	0.000147732
210.95	0.000129266
210.95	0.000116955
210.95	9.84882e-05
210.95	7.38662e-05
210.95	6.77106e-05
210.95	9.23327e-05
210.95	8.00217e-05
210.95	0.000135421
210.95	9.84882e-05
210.95	0.000104644
210.95	5.53996e-05
210.95	9.23327e-05
210.95	0.000116955
211.896	0.00012311
211.896	0.000135421
211.896	9.84882e-05
211.896	7.38662e-05
211.896	0.000116955
211.896	9.23327e-05
211.896	8.61772e-05
211.896	8.61772e-05
212.132	0.00012311
212.132	0.000135421
212.132	0.000166199
212.132	9.23327e-05
212.132	6.77106e-05
212.132	6.15551e-05
212.132	9.84882e-05
212.132	6.77106e-05
212.132	0.000110799
212.132	0.000104644
212.132	8.61772e-05
212.132	0.000110799
212.603	0.000184665
212.603	9.84882e-05
212.603	0.000129266
212.603	8.00217e-05
212.603	0.00012311
212.603	9.23327e-05
212.603	9.84882e-05
212.603	0.00012311
213.776	0.000116955
213.776	0.000141577
213.776	7.38662e-05
213.776	5.53996e-05
213.776	0.000104644
213.776	6.15551e-05
213.776	7.38662e-05
213.776	0.000104644
214.009	0.000172354
214.009	0.000129266
214.009	0.000116955
214.009	7.38662e-05
214.009	0.00012311
214.009	8.61772e-05
214.009	8.00217e-05
214.009	9.84882e-05
214.709	0.000129266
214.709	0.000116955
214.709	0.000104644
214.709	8.61772e-05
214.709	0.000116955
214.709	9.23327e-05
214.709	9.84882e-05
214.709	6.15551e-05
215.407	0.00012311
215.407	0.000110799
215.407	9.23327e-05
215.407	6.15551e-05
215.407	0.000104644
215.407	8.61772e-05
215.407	8.61772e-05
215.407	8.00217e-05
215.87	0.000116955
215.87	0.000141577
215.87	8.61772e-05
215.87	5.53996e-05
215.87	0.000110799
215.87	6.77106e-05
215.87	6.15551e-05
215.87	9.84882e-05
216.333	0.000147732
216.333	0.000129266
216.333	0.000104644
216.333	9.23327e-05
216.333	0.000104644
216.333	8.61772e-05
216.333	9.84882e-05
216.333	6.77106e-05
218.403	0.000116955
218.403	0.000129266
218.403	9.23327e-05
218.403	6.15551e-05
218.403	0.000110799
218.403	8.00217e-05
218.403	6.15551e-05
218.403	9.23327e-05
219.317	0.00012311
219.317	9.84882e-05
219.317	0.000172354
219.317	8.00217e-05
219.317	0.000135421
219.317	7.38662e-05
219.317	9.23327e-05
219.317	5.53996e-05
219.317	0.000104644
219.317	8.00217e-05
219.317	9.84882e-05
219.317	9.84882e-05
219.317	9.84882e-05
219.317	0.000110799
219.317	8.61772e-05
219.317	7.38662e-05
219.545	0.00012311
219.545	0.00012311
219.545	9.84882e-05
219.545	9.23327e-05
219.545	0.000110799
219.545	9.23327e-05
219.545	9.23327e-05
219.545	5.53996e-05
220	0.000104644
220	7.38662e-05
220	5.53996e-05
220	8.00217e-05
220.227	0.000104644
220.227	9.84882e-05
220.227	0.000172354
220.227	9.23327e-05
220.227	0.000104644
220.227	6.15551e-05
220.227	6.77106e-05
220.227	6.15551e-05
220.227	8.00217e-05
220.227	5.53996e-05
220.227	8.61772e-05
220.227	8.61772e-05
220.227	8.61772e-05
220.227	0.000110799
220.227	8.00217e-05
220.227	9.23327e-05
220.907	0.000104644
220.907	9.23327e-05
220.907	6.77106e-05
220.907	6.15551e-05
220.907	8.00217e-05
220.907	6.15551e-05
220.907	8.00217e-05
220.907	9.23327e-05
221.359	0.00012311
221.359	0.000116955
221.359	9.23327e-05
221.359	6.15551e-05
221.359	9.84882e-05
221.359	8.00217e-05
221.359	6.15551e-05
221.359	8.00217e-05
222.036	0.000110799
222.036	9.23327e-05
222.036	0.000141577
222.036	0.000116955
222.036	9.23327e-05
222.036	8.00217e-05
222.036	6.15551e-05
222.036	5.53996e-05
222.036	8.61772e-05
222.036	5.53996e-05
222.036	8.61772e-05
222.036	8.61772e-05
222.036	8.61772e-05
222.036	7.38662e-05
222.036	8.00217e-05
222.036	8.61772e-05
223.607	0.000110799
223.607	9.23327e-05
223.607	0.000116955
223.607	9.84882e-05
223.607	0.000104644
223.607	6.77106e-05
223.607	6.15551e-05
223.607	4.92441e-05
223.607	9.23327e-05
223.607	4.92441e-05
223.607	0.000104644
223.607	8.61772e-05
223.607	8.00217e-05
223.607	6.15551e-05
223.607	6.77106e-05
223.607	8.00217e-05
224.722	0.000116955
224.722	9.23327e-05
224.722	0.00012311
224.722	0.000116955
224.722	9.23327e-05
224.722	9.84882e-05
224.722	9.23327e-05
224.722	5.53996e-05
224.722	9.23327e-05
224.722	8.00217e-05
224.722	8.61772e-05
224.722	8.61772e-05
224.722	9.23327e-05
224.722	5.53996e-05
224.722	6.15551e-05
224.722	8.00217e-05
225.61	0.000110799
225.61	9.23327e-05
225.61	7.38662e-05
225.61	4.92441e-05
225.61	9.23327e-05
225.61	4.92441e-05
225.61	5.53996e-05
225.61	7.38662e-05
226.274	0.000147732
226.274	6.77106e-05
226.274	9.23327e-05
226.274	0.000104644
226.716	0.000166199
226.716	7.38662e-05
226.716	0.000104644
226.716	6.77106e-05
226.716	7.38662e-05
226.716	9.23327e-05
226.716	9.23327e-05
226.716	9.84882e-05
228.035	0.000110799
228.035	8.61772e-05
228.035	0.000141577
228.035	8.61772e-05
228.035	9.23327e-05
228.035	6.15551e-05
228.035	8.61772e-05
228.035	4.92441e-05
228.035	8.61772e-05
228.035	6.15551e-05
228.035	6.77106e-05
228.035	8.61772e-05
228.035	8.61772e-05
228.035	8.61772e-05
228.035	4.92441e-05
228.035	7.38662e-05
228.254	0.000110799
228.254	9.84882e-05
228.254	9.84882e-05
228.254	6.77106e-05
228.254	9.84882e-05
228.254	8.61772e-05
228.254	8.61772e-05
228.254	5.53996e-05
228.473	0.000116955
228.473	8.61772e-05
228.473	9.23327e-05
228.473	4.92441e-05
228.473	8.61772e-05
228.473	8.00217e-05
228.473	6.15551e-05
228.473	7.38662e-05
230	7.38662e-05
230	7.38662e-05
230	5.53996e-05
230	6.77106e-05
230.217	7.38662e-05
230.217	6.77106e-05
230.217	0.00012311
230.217	0.000104644
230.217	8.61772e-05
230.217	8.61772e-05
230.217	7.38662e-05
230.217	5.53996e-05
230.217	8.00217e-05
230.217	5.53996e-05
230.217	6.77106e-05
230.217	8.00217e-05
230.217	8.61772e-05
230.217	6.15551e-05
230.217	6.77106e-05
230.217	7.38662e-05
230.868	8.00217e-05
230.868	6.77106e-05
230.868	0.000110799
230.868	8.00217e-05
230.868	8.61772e-05
230.868	4.30886e-05
230.868	6.77106e-05
230.868	5.53996e-05
230.868	8.61772e-05
230.868	5.53996e-05
230.868	8.61772e-05
230.868	6.77106e-05
230.868	4.30886e-05
230.868	7.38662e-05
230.868	7.38662e-05
230.868	7.38662e-05
231.948	9.23327e-05
231.948	6.15551e-05
231.948	6.15551e-05
231.948	4.92441e-05
231.948	8.61772e-05
231.948	4.92441e-05
231.948	7.38662e-05
231.948	6.15551e-05
232.594	0.000104644
232.594	8.61772e-05
232.594	9.84882e-05
232.594	5.53996e-05
232.594	8.61772e-05
232.594	8.00217e-05
232.594	6.77106e-05
232.594	6.77106e-05
233.238	0.000104644
233.238	9.23327e-05
233.238	9.84882e-05
233.238	7.38662e-05
233.238	8.00217e-05
233.238	8.00217e-05
233.238	9.23327e-05
233.238	5.53996e-05
233.452	9.23327e-05
233.452	6.15551e-05
233.452	0.000153888
233.452	7.38662e-05
233.452	0.000116955
233.452	7.38662e-05
233.452	5.53996e-05
233.452	4.30886e-05
233.452	8.61772e-05
233.452	4.92441e-05
233.452	8.00217e-05
233.452	8.61772e-05
233.452	8.61772e-05
233.452	9.23327e-05
233.452	6.15551e-05
233.452	5.53996e-05
234.094	0.000110799
234.094	6.77106e-05
234.094	8.00217e-05
234.094	4.30886e-05
234.094	8.00217e-05
234.094	7.38662e-05
234.094	4.92441e-05
234.094	7.38662e-05
234.307	0.000147732
234.307	6.77106e-05
234.307	9.23327e-05
234.307	7.38662e-05
234.307	6.15551e-05
234.307	8.00217e-05
234.307	8.00217e-05
234.307	7.38662e-05
235.372	9.23327e-05
235.372	6.77106e-05
235.372	6.15551e-05
235.372	4.30886e-05
235.372	8.61772e-05
235.372	4.92441e-05
235.372	4.92441e-05
235.372	5.53996e-05
236.008	0.00012311
236.008	8.00217e-05
236.008	8.00217e-05
236.008	7.38662e-05
236.008	6.15551e-05
236.008	6.77106e-05
236.008	7.38662e-05
236.008	6.77106e-05
237.065	9.23327e-05
237.065	8.61772e-05
237.065	9.23327e-05
237.065	6.77106e-05
237.065	9.23327e-05
237.065	7.38662e-05
237.065	8.00217e-05
237.065	6.15551e-05
237.697	9.84882e-05
237.697	6.77106e-05
237.697	0.000104644
237.697	6.77106e-05
237.697	8.00217e-05
237.697	4.30886e-05
237.697	6.77106e-05
237.697	4.30886e-05
237.697	8.61772e-05
237.697	6.15551e-05
237.697	7.38662e-05
237.697	8.00217e-05
237.697	5.53996e-05
237.697	6.77106e-05
237.697	3.69331e-05
237.697	5.53996e-05
238.537	0.000110799
238.537	8.61772e-05
238.537	8.61772e-05
238.537	7.38662e-05
238.537	8.00217e-05
238.537	6.77106e-05
238.537	8.61772e-05
238.537	5.53996e-05
240	5.53996e-05
240	6.15551e-05
240	4.30886e-05
240	6.15551e-05
240.208	6.77106e-05
240.208	5.53996e-05
240.208	6.15551e-05
240.208	4.92441e-05
240.208	6.77106e-05
240.208	3.69331e-05
240.208	6.15551e-05
240.208	6.15551e-05
240.416	9.23327e-05
240.416	6.77106e-05
240.416	0.00012311
240.416	8.00217e-05
240.416	7.38662e-05
240.416	4.30886e-05
240.416	8.00217e-05
240.416	6.77106e-05
240.416	7.38662e-05
240.416	8.61772e-05
240.416	3.69331e-05
240.416	5.53996e-05
240.832	7.38662e-05
240.832	4.92441e-05
240.832	0.000147732
240.832	6.77106e-05
240.832	0.000104644
240.832	8.00217e-05
240.832	6.15551e-05
240.832	4.30886e-05
240.832	8.00217e-05
240.832	3.69331e-05
240.832	6.77106e-05
240.832	8.00217e-05
240.832	7.38662e-05
240.832	6.77106e-05
240.832	6.77106e-05
240.832	6.15551e-05
241.661	9.84882e-05
241.661	6.77106e-05
241.661	8.00217e-05
241.661	4.30886e-05
241.661	8.00217e-05
241.661	7.38662e-05
241.661	6.15551e-05
241.661	6.77106e-05
241.868	8.00217e-05
241.868	4.92441e-05
241.868	8.61772e-05
241.868	8.00217e-05
241.868	8.61772e-05
241.868	7.38662e-05
241.868	5.53996e-05
241.868	3.69331e-05
241.868	8.00217e-05
241.868	3.69331e-05
241.868	8.00217e-05
241.868	6.77106e-05
241.868	9.23327e-05
241.868	6.15551e-05
241.868	6.77106e-05
241.868	4.92441e-05
242.074	0.000129266
242.074	6.77106e-05
242.074	8.00217e-05
242.074	7.38662e-05
242.074	6.15551e-05
242.074	6.77106e-05
242.074	6.77106e-05
242.074	6.77106e-05
243.311	8.61772e-05
243.311	4.92441e-05
243.311	4.92441e-05
243.311	3.69331e-05
243.311	7.38662e-05
243.311	4.30886e-05
243.311	5.53996e-05
243.311	4.92441e-05
243.516	9.23327e-05
243.516	6.15551e-05
243.516	8.00217e-05
243.516	4.30886e-05
243.516	7.38662e-05
243.516	7.38662e-05
243.516	4.30886e-05
243.516	5.53996e-05
244.131	0.000104644
244.131	6.77106e-05
244.131	8.00217e-05
244.131	6.77106e-05
244.131	7.38662e-05
244.131	5.53996e-05
244.131	6.77106e-05
244.131	6.15551e-05
245.153	9.84882e-05
245.153	4.92441e-05
245.153	4.92441e-05
245.153	3.69331e-05
245.153	8.00217e-05
245.153	4.30886e-05
245.153	4.30886e-05
245.153	4.92441e-05
245.967	8.00217e-05
245.967	6.77106e-05
245.967	7.38662e-05
245.967	5.53996e-05
245.967	7.38662e-05
245.967	6.15551e-05
245.967	8.00217e-05
245.967	6.77106e-05
246.982	9.84882e-05
246.982	5.53996e-05
246.982	8.61772e-05
246.982	7.38662e-05
246.982	8.00217e-05
246.982	7.38662e-05
246.982	7.38662e-05
246.982	3.69331e-05
246.982	6.77106e-05
246.982	6.77106e-05
246.982	8.00217e-05
246.982	4.30886e-05
246.982	8.61772e-05
246.982	5.53996e-05
246.982	4.92441e-05
246.982	5.53996e-05
247.386	9.84882e-05
247.386	6.15551e-05
247.386	5.53996e-05
247.386	4.30886e-05
247.386	8.00217e-05
247.386	4.30886e-05
247.386	3.69331e-05
247.386	5.53996e-05
247.588	0.000135421
247.588	8.00217e-05
247.588	0.000110799
247.588	8.61772e-05
247.588	6.77106e-05
247.588	7.38662e-05
247.588	6.15551e-05
247.588	6.77106e-05
248.395	0.000135421
248.395	6.77106e-05
248.395	9.23327e-05
248.395	8.00217e-05
248.395	6.15551e-05
248.395	6.77106e-05
248.395	6.77106e-05
248.395	6.15551e-05
250	5.53996e-05
250	8.61772e-05
250	6.15551e-05
250	0.000104644
250	6.77106e-05
250	8.00217e-05
250	6.15551e-05
250	6.15551e-05
250	4.30886e-05
250	4.92441e-05
250	3.69331e-05
250	7.38662e-05
250	4.92441e-05
250	6.77106e-05
250	5.53996e-05
250	6.15551e-05
250	5.53996e-05
250	3.69331e-05
250	4.92441e-05
250	4.30886e-05
250.2	6.15551e-05
250.2	4.92441e-05
250.2	4.30886e-05
250.2	3.69331e-05
250.2	6.77106e-05
250.2	3.07776e-05
250.2	4.30886e-05
250.2	4.92441e-05
250.599	7.38662e-05
250.599	6.15551e-05
250.599	7.38662e-05
250.599	6.77106e-05
250.599	6.77106e-05
250.599	4.92441e-05
250.599	9.23327e-05
250.599	6.77106e-05
250.799	6.15551e-05
250.799	4.30886e-05
250.799	8.61772e-05
250.799	6.15551e-05
250.799	7.38662e-05
250.799	3.69331e-05
250.799	4.30886e-05
250.799	3.07776e-05
250.799	8.00217e-05
250.799	3.07776e-05
250.799	6.77106e-05
250.799	6.15551e-05
250.799	6.15551e-05
250.799	5.53996e-05
250.799	4.92441e-05
250.799	4.92441e-05
251.794	6.15551e-05
251.794	3.69331e-05
251.794	4.30886e-05
251.794	3.07776e-05
251.794	7.38662e-05
[truncated: 603 more rows]

## Sheet: Figure 1 - figure supplement 1
Figure 1 - figure supplement 1
Extra EM data from WT animals (nm)						STED data
						Distance to center of picture (nm)	Fluorescence intensity
0						0	0.00085427
0						10	0.00085427
32						10	0.000844394
43						10	0.000883898
44						10	0.00087896
46						14.1421	0.000834518
50						14.1421	0.000883898
53						14.1421	0.000874022
53						14.1421	0.000898712
53						20	0.000883898
63						20	0.000859208
66						20	0.00092834
71						20	0.000918464
77						22.3607	0.000849332
80						22.3607	0.00090365
93						22.3607	0.000834518
99						22.3607	0.000918464
117						22.3607	0.00087896
119						22.3607	0.000948092
130						22.3607	0.000918464
142						22.3607	0.000933278
143						28.2843	0.000839456
159						28.2843	0.000923402
194						28.2843	0.000913526
253						28.2843	0.000972782
						30	0.00092834
						30	0.000913526
						30	0.000997472
						30	0.000992534
						31.6228	0.000908588
						31.6228	0.000933278
						31.6228	0.000883898
						31.6228	0.000972782
						31.6228	0.000923402
						31.6228	0.00101229
						31.6228	0.00097772
						31.6228	0.00101229
						36.0555	0.000898712
						36.0555	0.000938216
						36.0555	0.000874022
						36.0555	0.000962906
						36.0555	0.000948092
						36.0555	0.0010271
						36.0555	0.000972782
						36.0555	0.00103204
						40	0.00097772
						40	0.00100241
						40	0.00107154
						40	0.00107648
						41.2311	0.000982658
						41.2311	0.000967844
						41.2311	0.000972782
						41.2311	0.00104685
						41.2311	0.00101229
						41.2311	0.00108142
						41.2311	0.00105673
						41.2311	0.00110117
						42.4264	0.000918464
						42.4264	0.000972782
						42.4264	0.000992534
						42.4264	0.0010666
						44.7214	0.000987596
						44.7214	0.00097772
						44.7214	0.00095303
						44.7214	0.00103204
						44.7214	0.0010271
						44.7214	0.00108142
						44.7214	0.00104191
						44.7214	0.00111105
						50	0.0010271
						50	0.000992534
						50	0.00100241
						50	0.000967844
						50	0.00103204
						50	0.00110611
						50	0.00112092
						50	0.00105673
						50	0.00111105
						50	0.00104685
						50	0.00113574
						50	0.00114561
						50.9902	0.00105179
						50.9902	0.00101229
						50.9902	0.00107154
						50.9902	0.00110117
						50.9902	0.00112092
						50.9902	0.0011308
						50.9902	0.00111105
						50.9902	0.00118018
						53.8516	0.00106167
						53.8516	0.00101722
						53.8516	0.00104191
						53.8516	0.00109129
						53.8516	0.0011308
						53.8516	0.00113574
						53.8516	0.00109623
						53.8516	0.00119005
						56.5685	0.00100241
						56.5685	0.00105179
						56.5685	0.00109129
						56.5685	0.00117524
						58.3095	0.00105673
						58.3095	0.00103698
						58.3095	0.00103204
						58.3095	0.00109129
						58.3095	0.00114067
						58.3095	0.00116043
						58.3095	0.00109129
						58.3095	0.00119993
						60	0.00108636
						60	0.00119005
						60	0.00115055
						60	0.00119499
						60.8276	0.00111598
						60.8276	0.00106167
						60.8276	0.00116043
						60.8276	0.0011308
						60.8276	0.0012098
						60.8276	0.0011703
						60.8276	0.00116043
						60.8276	0.00122956
						63.2456	0.00112092
						63.2456	0.00106167
						63.2456	0.00112092
						63.2456	0.00112586
						63.2456	0.0012098
						63.2456	0.00117524
						63.2456	0.00114561
						63.2456	0.00124437
						64.0312	0.00104191
						64.0312	0.00108142
						64.0312	0.00103204
						64.0312	0.00110117
						64.0312	0.00115055
						64.0312	0.00121474
						64.0312	0.00111598
						64.0312	0.00122956
						67.082	0.00110611
						67.082	0.00107648
						67.082	0.00109623
						67.082	0.00112586
						67.082	0.00120487
						67.082	0.00119005
						67.082	0.00114067
						67.082	0.00124437
						70	0.00115055
						70	0.00121968
						70	0.00116536
						70	0.00123449
						70.7107	0.00117524
						70.7107	0.00111598
						70.7107	0.00105179
						70.7107	0.00112092
						70.7107	0.00119993
						70.7107	0.00115055
						70.7107	0.00123449
						70.7107	0.0011703
						70.7107	0.00115055
						70.7107	0.00124931
						70.7107	0.0012098
						70.7107	0.00125425
						72.111	0.00108142
						72.111	0.00111105
						72.111	0.00107648
						72.111	0.00112586
						72.111	0.00119499
						72.111	0.00121474
						72.111	0.00115055
						72.111	0.00124437
						72.8011	0.00116043
						72.8011	0.00110611
						72.8011	0.0011703
						72.8011	0.00114067
						72.8011	0.00124437
						72.8011	0.0011703
						72.8011	0.00119499
						72.8011	0.00125918
						76.1577	0.0011308
						76.1577	0.00111105
						76.1577	0.00114067
						76.1577	0.00112586
						76.1577	0.00123943
						76.1577	0.00116536
						76.1577	0.00118018
						76.1577	0.00125425
						78.1025	0.0010666
						78.1025	0.00114067
						78.1025	0.00107154
						78.1025	0.0011308
						78.1025	0.00117524
						78.1025	0.00122462
						78.1025	0.00116536
						78.1025	0.00123449
						80	0.00118018
						80	0.0012098
						80	0.0011308
						80	0.00123449
						80.6226	0.00119993
						80.6226	0.00114561
						80.6226	0.00110611
						80.6226	0.00114561
						80.6226	0.00111105
						80.6226	0.00111105
						80.6226	0.00120487
						80.6226	0.0011308
						80.6226	0.00121474
						80.6226	0.00111598
						80.6226	0.0012098
						80.6226	0.00116536
						80.6226	0.00118018
						80.6226	0.00122956
						80.6226	0.00122462
						80.6226	0.00123449
						82.4621	0.00117524
						82.4621	0.00112586
						82.4621	0.00119005
						82.4621	0.00112092
						82.4621	0.00122956
						82.4621	0.00110117
						82.4621	0.0012098
						82.4621	0.00122956
						84.8528	0.0010666
						84.8528	0.00112586
						84.8528	0.0011703
						84.8528	0.00119499
						85.44	0.00114561
						85.44	0.0011308
						85.44	0.00116043
						85.44	0.00109623
						85.44	0.00122462
						85.44	0.00109129
						85.44	0.00119005
						85.44	0.0012098
						86.0233	0.00108142
						86.0233	0.00115055
						86.0233	0.00108636
						86.0233	0.00109129
						86.0233	0.00117524
						86.0233	0.00116043
						86.0233	0.00118511
						86.0233	0.00119005
						89.4427	0.00112092
						89.4427	0.00114561
						89.4427	0.00111598
						89.4427	0.00106167
						89.4427	0.00119499
						89.4427	0.00107648
						89.4427	0.00118511
						89.4427	0.0011703
						90	0.00118018
						90	0.00118018
						90	0.00106167
						90	0.00118018
						90.5539	0.00118511
						90.5539	0.00115055
						90.5539	0.00119005
						90.5539	0.00107648
						90.5539	0.00117524
						90.5539	0.00102216
						90.5539	0.00118018
						90.5539	0.0011703
						92.1954	0.00116536
						92.1954	0.00112092
						92.1954	0.00106167
						92.1954	0.00111598
						92.1954	0.0010666
						92.1954	0.00107154
						92.1954	0.00118511
						92.1954	0.0010666
						92.1954	0.00117524
						92.1954	0.00100241
						92.1954	0.00114561
						92.1954	0.00112092
						92.1954	0.00116536
						92.1954	0.00113574
						92.1954	0.00116536
						92.1954	0.00114561
						94.3398	0.00108636
						94.3398	0.00113574
						94.3398	0.00108142
						94.3398	0.00102216
						94.3398	0.00114561
						94.3398	0.00105673
						94.3398	0.00117524
						94.3398	0.00111598
						94.8683	0.00114561
						94.8683	0.00111598
						94.8683	0.00115549
						94.8683	0.00104191
						94.8683	0.0011703
						94.8683	0.000982658
						94.8683	0.00115549
						94.8683	0.00111105
						98.4886	0.00112092
						98.4886	0.00111105
						98.4886	0.00110117
						98.4886	0.00100241
						98.4886	0.0011308
						98.4886	0.000962906
						98.4886	0.00113574
						98.4886	0.00105673
						98.9949	0.00105179
						98.9949	0.00104191
						98.9949	0.00111598
						98.9949	0.00104191
						100	0.00115055
						100	0.00104685
						100	0.00109129
						100	0.00105673
						100	0.000997472
						100	0.00115549
						100	0.000972782
						100	0.00110117
						100	0.00101229
						100	0.00113574
						100	0.00104685
						100	0.00108142
						100.499	0.00115055
						100.499	0.00112586
						100.499	0.00117524
						100.499	0.00100241
						100.499	0.0011308
						100.499	0.000933278
						100.499	0.00108636
						100.499	0.0010666
						101.98	0.0011308
						101.98	0.00110117
						101.98	0.0011703
						101.98	0.00100241
						101.98	0.00110611
						101.98	0.00090365
						101.98	0.00107648
						101.98	0.00103204
						102.956	0.00108636
						102.956	0.00109129
						102.956	0.00106167
						102.956	0.000957968
						102.956	0.00108142
						102.956	0.000943154
						102.956	0.00111105
						102.956	0.00100241
						104.403	0.00111598
						104.403	0.00108636
						104.403	0.00113574
						104.403	0.00097772
						104.403	0.00108142
						104.403	0.00087896
						104.403	0.00106167
						104.403	0.000987596
						106.301	0.00102216
						106.301	0.00100241
						106.301	0.00103698
						106.301	0.000962906
						106.301	0.00105179
						106.301	0.00092834
						106.301	0.00107154
						106.301	0.000948092
						107.703	0.00110117
						107.703	0.00107154
						107.703	0.00108636
						107.703	0.000938216
						107.703	0.00104191
						107.703	0.00085427
						107.703	0.00103204
						107.703	0.00092834
						108.167	0.00103204
						108.167	0.00103204
						108.167	0.00103698
						108.167	0.000923402
						108.167	0.0010271
						108.167	0.000893774
						108.167	0.00106167
						108.167	0.000938216
						110	0.00108636
						110	0.00112092
						110	0.000869084
						110	0.000967844
						110.454	0.00108636
						110.454	0.0010666
						110.454	0.0011308
						110.454	0.000908588
						110.454	0.00108142
						110.454	0.000834518
						110.454	0.00097772
						110.454	0.000948092
						111.803	0.0010666
						111.803	0.00104685
						111.803	0.0010666
						111.803	0.00104191
						111.803	0.00103698
						111.803	0.000893774
						111.803	0.00111598
						111.803	0.000923402
						111.803	0.0010271
						111.803	0.000809829
						111.803	0.000987596
						111.803	0.00082958
						111.803	0.000997472
						111.803	0.00087896
						111.803	0.000967844
						111.803	0.000913526
						113.137	0.00100241
						113.137	0.000918464
						113.137	0.00100735
						113.137	0.000839456
						114.018	0.00105179
						114.018	0.00103204
						114.018	0.000987596
						114.018	0.000943154
						114.018	0.00100735
						114.018	0.000883898
						114.018	0.00107648
						114.018	0.000898712
						114.018	0.000982658
						114.018	0.000790077
						114.018	0.00097772
						114.018	0.000819705
						114.018	0.000987596
						114.018	0.000844394
						114.018	0.000943154
						114.018	0.000864146
						116.619	0.00101229
						116.619	0.000972782
						116.619	0.000997472
						116.619	0.000849332
						116.619	0.000933278
						116.619	0.000780201
						116.619	0.000943154
						116.619	0.000819705
						117.047	0.00104191
						117.047	0.00101229
						117.047	0.00103204
						117.047	0.000859208
						117.047	0.000938216
						117.047	0.000765387
						117.047	0.000913526
						117.047	0.000804891
						120	0.000992534
						120	0.00104191
						120	0.000780201
						120	0.000839456
						120.416	0.000997472
						120.416	0.000982658
						120.416	0.00095303
						120.416	0.00085427
						120.416	0.000957968
						120.416	0.000834518
						120.416	0.00104685
						120.416	0.000819705
						120.416	0.00100241
						120.416	0.000750573
						120.416	0.00092834
						120.416	0.000740697
						120.416	0.000923402
						120.416	0.000745635
						120.416	0.000844394
						120.416	0.000819705
						120.83	0.00101722
						120.83	0.00097772
						120.83	0.000982658
						120.83	0.000814767
						120.83	0.000888836
						120.83	0.000725883
						120.83	0.000864146
						120.83	0.000745635
						121.655	0.000972782
						121.655	0.000967844
						121.655	0.0010271
						121.655	0.000839456
						121.655	0.000938216
						121.655	0.000725883
						121.655	0.000834518
						121.655	0.000790077
						122.066	0.00095303
						122.066	0.00087896
						122.066	0.00095303
						122.066	0.000814767
						122.066	0.000888836
						122.066	0.000711069
						122.066	0.000869084
						122.066	0.000745635
						123.693	0.000948092
						123.693	0.00095303
						123.693	0.000992534
						123.693	0.000819705
						123.693	0.000874022
						123.693	0.000711069
						123.693	0.000804891
						123.693	0.000740697
						125.3	0.000972782
						125.3	0.000913526
						125.3	0.000933278
						125.3	0.000775263
						125.3	0.000834518
						125.3	0.000666627
						125.3	0.000804891
						125.3	0.000691317
						126.491	0.000943154
						126.491	0.000933278
						126.491	0.000948092
						126.491	0.000780201
						126.491	0.000819705
						126.491	0.000681441
						126.491	0.000770325
						126.491	0.000686379
						127.279	0.000898712
						127.279	0.000775263
						127.279	0.000859208
						127.279	0.000661689
						128.062	0.000898712
						128.062	0.000785139
						128.062	0.000888836
						128.062	0.000770325
						128.062	0.000844394
						128.062	0.000632061
						128.062	0.000804891
						128.062	0.000661689
						130	0.000883898
						130	0.00092834
						130	0.000908588
						130	0.000893774
						130	0.000735759
						130	0.00092834
						130	0.000696255
						130	0.000780201
						130	0.000632061
						130	0.000725883
						130	0.000627123
						130	0.000706131
						130.384	0.000874022
						130.384	0.00087896
						130.384	0.000908588
						130.384	0.000819705
						130.384	0.000874022
						130.384	0.000745635
						130.384	0.000933278
						130.384	0.000725883
						130.384	0.000898712
						130.384	0.000671565
						130.384	0.000790077
						130.384	0.000597495
						130.384	0.000735759
						130.384	0.000636999
						130.384	0.000701193
						130.384	0.000691317
						131.529	0.00085427
						131.529	0.000859208
						131.529	0.000913526
						131.529	0.000740697
						131.529	0.000839456
						131.529	0.000646875
						131.529	0.000686379
						131.529	0.000666627
						133.417	0.000834518
						133.417	0.000834518
						133.417	0.000883898
						133.417	0.000725883
						133.417	0.000770325
						133.417	0.000622185
						133.417	0.000666627
						133.417	0.000622185
						134.164	0.000893774
						134.164	0.000844394
						134.164	0.000839456
						134.164	0.000696255
						134.164	0.000730821
						134.164	0.000567868
						134.164	0.000666627
						134.164	0.000572806
						134.536	0.000834518
						134.536	0.000701193
						134.536	0.000819705
						134.536	0.000716007
						134.536	0.000790077
						134.536	0.00056293
						134.536	0.000760449
						134.536	0.000582682
						136.015	0.000824642
						136.015	0.000819705
						136.015	0.000834518
						136.015	0.000716007
						136.015	0.000804891
						136.015	0.000711069
						136.015	0.000844394
						136.015	0.000696255
						136.015	0.000720945
						136.015	0.000592557
						136.015	0.000740697
						136.015	0.000523426
						136.015	0.000686379
						136.015	0.000572806
						136.015	0.000641937
						136.015	0.000572806
						138.924	0.000844394
						138.924	0.000750573
						138.924	0.000775263
						138.924	0.000666627
						138.924	0.000681441
						138.924	0.000493798
						138.924	0.000612309
						138.924	0.000528364
						139.284	0.000809829
						139.284	0.000795015
						139.284	0.000790077
						139.284	0.000656751
						139.284	0.000676503
						139.284	0.000548116
						139.284	0.000597495
						139.284	0.000523426
						140	0.000760449
						140	0.000814767
						140	0.000597495
						140	0.000577744
						140.357	0.000740697
						140.357	0.000765387
						140.357	0.000814767
						140.357	0.000622185
						140.357	0.000790077
						140.357	0.000572806
						140.357	0.000572806
						140.357	0.000572806
						141.421	0.000716007
						141.421	0.000745635
						141.421	0.000750573
						141.421	0.000636999
						141.421	0.000795015
						141.421	0.000632061
						141.421	0.000740697
						141.421	0.000553054
						141.421	0.000711069
						141.421	0.000508612
						141.421	0.000572806
						141.421	0.000553054
						142.127	0.000765387
						142.127	0.000622185
						142.127	0.000725883
						142.127	0.000656751
						142.127	0.000696255
						142.127	0.000454294
						142.127	0.000646875
						142.127	0.00051355
						143.178	0.000706131
						143.178	0.000711069
						143.178	0.000795015
						143.178	0.000735759
						143.178	0.000725883
						143.178	0.000617247
						143.178	0.000775263
						143.178	0.000636999
						143.178	0.000681441
						143.178	0.000533302
						143.178	0.000632061
						143.178	0.000483922
						143.178	0.000543178
						143.178	0.000474046
						143.178	0.00056293
						143.178	0.000518488
						144.222	0.000780201
						144.222	0.000646875
						144.222	0.000706131
						144.222	0.000632061
						144.222	0.000641937
						144.222	0.000429604
						144.222	0.000572806
						144.222	0.000483922
						145.602	0.000691317
						145.602	0.000676503
						145.602	0.000740697
						145.602	0.000622185
						145.602	0.000627123
						145.602	0.000503674
						145.602	0.000543178
						145.602	0.000474046
						147.648	0.000765387
						147.648	0.000646875
						147.648	0.000666627
						147.648	0.000577744
						147.648	0.000592557
						147.648	0.00041479
						147.648	0.000498736
						147.648	0.000429604
						148.661	0.000681441
						148.661	0.000651813
						148.661	0.000676503
						148.661	0.000553054
						148.661	0.000646875
						148.661	0.000587619
						148.661	0.000686379
						148.661	0.000577744
						148.661	0.000587619
						148.661	0.000469108
						148.661	0.000632061
						148.661	0.00041479
						148.661	0.000607371
						148.661	0.000454294
						148.661	0.000498736
						148.661	0.000434542
						150	0.000646875
						150	0.000701193
						150	0.000553054
						150	0.000632061
						150	0.000587619
						150	0.000725883
						150	0.00048886
						150	0.000592557
						150	0.000380224
						150	0.000533302
						150	0.00043948
						150	0.00046417
						150.333	0.000617247
						150.333	0.000656751
						150.333	0.000720945
						150.333	0.000503674
						150.333	0.000691317
						150.333	0.000469108
						150.333	0.000474046
						150.333	0.00046417
						151.327	0.000592557
						151.327	0.000632061
						151.327	0.000696255
						151.327	0.00051355
						151.327	0.000627123
						151.327	0.000444418
						151.327	0.000478984
						151.327	0.000454294
						152.315	0.000671565
						152.315	0.000597495
						152.315	0.000627123
						152.315	0.000533302
						152.315	0.000548116
						152.315	0.000419728
						152.315	0.000454294
						152.315	0.0003901
						152.643	0.000711069
						152.643	0.000553054
						152.643	0.000607371
						152.643	0.000543178
						152.643	0.000548116
						152.643	0.000355534
						152.643	0.00046417
						152.643	0.000399976
						152.971	0.000582682
						152.971	0.000592557
						152.971	0.000666627
						152.971	0.000528364
						152.971	0.000567868
						152.971	0.000419728
						152.971	0.000483922
						152.971	0.000434542
						155.242	0.000572806
						155.242	0.000548116
						155.242	0.000632061
						155.242	0.000518488
						155.242	0.000528364
						155.242	0.000404914
						155.242	0.000469108
						155.242	0.000404914
						155.563	0.000577744
						155.563	0.000503674
						155.563	0.000543178
						155.563	0.000385162
						156.205	0.000612309
						156.205	0.00048886
						156.205	0.000553054
						156.205	0.000533302
						156.205	0.000543178
						156.205	0.000355534
						156.205	0.000493798
						156.205	0.000395038
						156.525	0.000661689
						156.525	0.00051355
						156.525	0.00056293
						156.525	0.000483922
						156.525	0.000508612
						156.525	0.000360472
						156.525	0.00041479
						156.525	0.000345659
						158.114	0.00056293
						158.114	0.000508612
						158.114	0.000632061
						158.114	0.000478984
						158.114	0.000543178
						158.114	0.000508612
						158.114	0.000587619
						158.114	0.00048886
						158.114	0.000508612
						158.114	0.000385162
						158.114	0.000498736
						158.114	0.000316031
						158.114	0.000429604
						158.114	0.00036541
						158.114	0.000429604
						158.114	0.00036541
						160	0.000548116
						160	0.000617247
						160	0.000395038
						160	0.000385162
						160.312	0.00051355
						160.312	0.00056293
						160.312	0.000612309
						160.312	0.000404914
						160.312	0.000582682
						160.312	0.000370348
						160.312	0.000404914
						160.312	0.000380224
						161.245	0.000483922
						161.245	0.000533302
						161.245	0.000622185
						161.245	0.000449356
						161.245	0.00051355
						161.245	0.000444418
						161.245	0.000587619
						161.245	0.000409852
						161.245	0.000518488
						161.245	0.000345659
						161.245	0.000469108
						161.245	0.000306155
						161.245	0.000385162
						161.245	0.000311093
						161.245	0.00041479
						161.245	0.000375286
						161.555	0.000557992
						161.555	0.000459232
						161.555	0.000533302
						161.555	0.000444418
						161.555	0.000483922
						161.555	0.000345659
						161.555	0.000385162
						161.555	0.000316031
						162.788	0.000474046
						162.788	0.00048886
						162.788	0.000523426
						162.788	0.000444418
						162.788	0.000478984
						162.788	0.000459232
						162.788	0.000557992
						162.788	0.000419728
						162.788	0.000459232
						162.788	0.000330845
						162.788	0.000474046
						162.788	0.000335783
						162.788	0.000444418
						162.788	0.000340721
						162.788	0.00041479
						162.788	0.000370348
						164.012	0.000553054
						164.012	0.000429604
						164.012	0.000474046
						164.012	0.000459232
						164.012	0.000454294
						164.012	0.000301217
						164.012	0.000385162
						164.012	0.000330845
						164.924	0.000469108
						164.924	0.000449356
						164.924	0.000528364
						164.924	0.00041479
						164.924	0.000424666
						164.924	0.000320969
						164.924	0.000399976
						164.924	0.000355534
						165.529	0.000548116
						165.529	0.000399976
						165.529	0.000478984
						165.529	0.000399976
						165.529	0.000454294
						165.529	0.000301217
						165.529	0.000345659
						165.529	0.000276527
						166.433	0.000553054
						166.433	0.000404914
						166.433	0.000459232
						166.433	0.000404914
						166.433	0.000429604
						166.433	0.000271589
						166.433	0.000355534
						166.433	0.000286403
						167.631	0.00046417
						167.631	0.000409852
						167.631	0.000493798
						167.631	0.0003901
						167.631	0.000424666
						167.631	0.000311093
						167.631	0.000370348
						167.631	0.000316031
						169.706	0.000434542
						169.706	0.000399976
						169.706	0.000395038
						169.706	0.000301217
						170	0.000449356
						170	0.000523426
						170	0.000355534
						170	0.000429604
						170	0.000355534
						170	0.000493798
						170	0.000296279
						170	0.000419728
						170	0.000261713
						170	0.000316031
						170	0.000241961
						170	0.000316031
						170.294	0.00041479
						170.294	0.000469108
						170.294	0.000474046
						170.294	0.000395038
						170.294	0.000404914
						170.294	0.000399976
						170.294	0.000483922
						170.294	0.000311093
						170.294	0.000469108
						170.294	0.000276527
						170.294	0.000409852
						170.294	0.000286403
						170.294	0.000350597
						170.294	0.000291341
						170.294	0.000340721
						170.294	0.000301217
						170.88	0.000459232
						170.88	0.00036541
						170.88	0.000454294
						170.88	0.000350597
						170.88	0.000424666
						170.88	0.000286403
						170.88	0.000330845
						170.88	0.000271589
						171.172	0.000380224
						171.172	0.000454294
						171.172	0.00046417
						171.172	0.000316031
						171.172	0.000419728
						171.172	0.000256775
						171.172	0.00036541
						171.172	0.000306155
						172.047	0.000483922
						172.047	0.000375286
						172.047	0.000399976
						172.047	0.00036541
						172.047	0.000385162
						172.047	0.000251837
						172.047	0.000320969
						172.047	0.000261713
						172.627	0.000370348
						172.627	0.00041479
						172.627	0.000449356
						172.627	0.000320969
						172.627	0.000370348
						172.627	0.000256775
						172.627	0.000370348
						172.627	0.000316031
						174.642	0.00036541
						174.642	0.000380224
						174.642	0.000449356
						174.642	0.000325907
						174.642	0.000409852
						174.642	0.000311093
						174.642	0.000434542
						174.642	0.000320969
						174.642	0.000350597
						174.642	0.000256775
						174.642	0.000404914
						174.642	0.000251837
						174.642	0.000301217
						174.642	0.000227147
						174.642	0.000355534
						174.642	0.000306155
						174.929	0.000469108
						174.929	0.000330845
						174.929	0.000385162
						174.929	0.000320969
						174.929	0.000380224
						174.929	0.000232085
						174.929	0.000296279
						174.929	0.000222209
						176.918	0.000395038
						176.918	0.000360472
						176.918	0.000360472
						176.918	0.000355534
						176.918	0.000350597
						176.918	0.000251837
						176.918	0.000320969
						176.918	0.000256775
						177.2	0.000355534
						177.2	0.000335783
						177.2	0.00041479
						177.2	0.000306155
						177.2	0.000355534
						177.2	0.000256775
						177.2	0.000340721
						177.2	0.000276527
						178.045	0.00041479
						178.045	0.000355534
						178.045	0.000340721
						178.045	0.000325907
						178.045	0.000345659
						178.045	0.000227147
						178.045	0.000296279
						178.045	0.000232085
						178.885	0.000429604
						178.885	0.000296279
						178.885	0.00036541
						178.885	0.000286403
						178.885	0.000380224
						178.885	0.000227147
						178.885	0.000276527
						178.885	0.000197519
						180	0.000350597
						180	0.000370348
						180	0.000217271
						180	0.000261713
						180.278	0.000320969
						180.278	0.000370348
						180.278	0.000355534
						180.278	0.000301217
						180.278	0.000399976
						180.278	0.000325907
						180.278	0.000335783
						180.278	0.000286403
						180.278	0.000385162
						180.278	0.000281465
						180.278	0.00036541
						180.278	0.000227147
						180.278	0.000360472
						180.278	0.000202457
						180.278	0.000360472
						180.278	0.000241961
						180.278	0.000345659
						180.278	0.000207395
						180.278	0.000276527
						180.278	0.000202457
						180.278	0.000311093
						180.278	0.000232085
						180.278	0.000291341
						180.278	0.000246899
						181.108	0.000296279
						181.108	0.000370348
						181.108	0.000355534
						181.108	0.000237023
						181.108	0.000330845
						181.108	0.000197519
						181.108	0.000316031
						181.108	0.000251837
						182.483	0.000281465
						182.483	0.000350597
						182.483	0.000345659
						182.483	0.000237023
						182.483	0.000306155
						182.483	0.000202457
						182.483	0.000335783
						182.483	0.000261713
						183.576	0.0003901
						183.576	0.000276527
						183.576	0.000325907
						183.576	0.000261713
						183.576	0.000350597
						183.576	0.000202457
						183.576	0.000256775
						183.576	0.000182705
						183.848	0.000350597
						183.848	0.000276527
						183.848	0.000340721
						183.848	0.000325907
						183.848	0.000355534
						183.848	0.000251837
						183.848	0.000360472
						183.848	0.000217271
						183.848	0.000291341
						183.848	0.000212333
						183.848	0.000281465
						183.848	0.000197519
						184.391	0.000271589
						184.391	0.000316031
						184.391	0.000355534
						184.391	0.000325907
						184.391	0.000316031
						184.391	0.000301217
						184.391	0.000345659
						184.391	0.000241961
						184.391	0.000286403
						184.391	0.000207395
						184.391	0.000306155
						184.391	0.000202457
						184.391	0.000281465
						184.391	0.000202457
						184.391	0.000335783
						184.391	0.000256775
						186.011	0.000340721
						186.011	0.000311093
						186.011	0.000301217
						186.011	0.000266651
						186.011	0.000306155
						186.011	0.000182705
						186.011	0.000261713
						186.011	0.000187643
						186.815	0.000266651
						186.815	0.000281465
						186.815	0.000340721
						186.815	0.000237023
						186.815	0.000286403
						186.815	0.000212333
						186.815	0.000325907
						186.815	0.000232085
						187.883	0.000340721
						187.883	0.000256775
						187.883	0.000316031
						187.883	0.000232085
						187.883	0.000350597
						187.883	0.000197519
						187.883	0.000256775
						187.883	0.000172829
						188.68	0.000330845
						188.68	0.000276527
						188.68	0.000286403
						188.68	0.000237023
						188.68	0.000316031
						188.68	0.000172829
						188.68	0.000246899
						188.68	0.000172829
						189.737	0.000271589
						189.737	0.000251837
						189.737	0.000320969
						189.737	0.000222209
						189.737	0.000296279
						189.737	0.000202457
						189.737	0.000306155
						189.737	0.000202457
						190	0.000281465
						190	0.000276527
						190	0.000148139
						190	0.000212333
						190.263	0.000261713
						190.263	0.000301217
						190.263	0.000276527
						190.263	0.000162953
						190.263	0.000276527
						190.263	0.000148139
						190.263	0.000232085
						190.263	0.000197519
						191.05	0.000246899
						191.05	0.000306155
						191.05	0.000320969
						191.05	0.000296279
						191.05	0.000301217
						191.05	0.000286403
						191.05	0.000271589
						191.05	0.000172829
						191.05	0.000271589
						191.05	0.000158015
						191.05	0.000261713
						191.05	0.000172829
						191.05	0.000261713
						191.05	0.000172829
						191.05	0.000256775
						191.05	0.000197519
						192.094	0.000306155
						192.094	0.000291341
						192.094	0.000286403
						192.094	0.000251837
						192.094	0.000266651
						192.094	0.000162953
						192.094	0.000256775
						192.094	0.000162953
						192.354	0.000227147
						192.354	0.000296279
						192.354	0.000316031
						192.354	0.000241961
						192.354	0.000281465
						192.354	0.000217271
						192.354	0.000271589
						192.354	0.000177767
						192.354	0.000261713
						192.354	0.000172829
						192.354	0.000325907
						192.354	0.000172829
						192.354	0.000232085
						192.354	0.000162953
						192.354	0.000281465
						192.354	0.000207395
						193.132	0.000271589
						193.132	0.000237023
						193.132	0.000301217
						193.132	0.000202457
						193.132	0.000301217
						193.132	0.000187643
						193.132	0.000271589
						193.132	0.000182705
						194.165	0.000212333
						194.165	0.000266651
						194.165	0.000286403
						194.165	0.000276527
						194.165	0.000271589
						194.165	0.000217271
						194.165	0.000276527
						194.165	0.000172829
						194.165	0.000241961
						194.165	0.000177767
						194.165	0.000281465
						194.165	0.000158015
						194.165	0.000241961
						194.165	0.000153077
						194.165	0.000286403
						194.165	0.000207395
						196.469	0.000207395
						196.469	0.000237023
						196.469	0.000276527
						196.469	0.000172829
						196.469	0.000237023
						196.469	0.000177767
						196.469	0.000281465
						196.469	0.000192581
						196.977	0.000266651
						196.977	0.000227147
						196.977	0.000276527
						196.977	0.000182705
						196.977	0.000301217
						196.977	0.000162953
						196.977	0.000237023
						196.977	0.000167891
						197.231	0.000281465
						197.231	0.000241961
						197.231	0.000256775
						197.231	0.000197519
						197.231	0.000296279
						197.231	0.000153077
						197.231	0.000227147
						197.231	0.000153077
						197.99	0.000281465
						197.99	0.000266651
						197.99	0.000237023
						197.99	0.000148139
						198.494	0.000286403
						198.494	0.000266651
						198.494	0.000276527
						198.494	0.000232085
						198.494	0.000232085
						198.494	0.000143201
						198.494	0.000237023
						198.494	0.000143201
						199.249	0.000212333
						199.249	0.000212333
						199.249	0.000276527
						199.249	0.000167891
						199.249	0.000241961
						199.249	0.000167891
						199.249	0.000266651
						199.249	0.000177767
						200	0.000222209
						200	0.000266651
						200	0.000261713
						200	0.000266651
						200	0.000202457
						200	0.000227147
						200	0.000108636
						200	0.000246899
						200	0.000143201
						200	0.000241961
						200	0.000133325
						200	0.000162953
						200.25	0.000207395
						200.25	0.000237023
						200.25	0.000227147
						200.25	0.000118511
						200.25	0.000232085
						200.25	0.000108636
						200.25	0.000187643
						200.25	0.000148139
						200.998	0.000197519
						200.998	0.000241961
						200.998	0.000227147
						200.998	0.000123449
						200.998	0.000232085
						200.998	0.000123449
						200.998	0.000212333
						200.998	0.000148139
						201.246	0.000246899
						201.246	0.000217271
						201.246	0.000246899
						201.246	0.000172829
						201.246	0.000286403
						201.246	0.000148139
						201.246	0.000207395
						201.246	0.000148139
						202.237	0.000187643
						202.237	0.000237023
						202.237	0.000227147
						202.237	0.000123449
						202.237	0.000227147
						202.237	0.000138263
						202.237	0.000227147
						202.237	0.000153077
						202.485	0.000217271
						202.485	0.000197519
						202.485	0.000246899
						202.485	0.000246899
						202.485	0.000251837
						202.485	0.000177767
						202.485	0.000261713
						202.485	0.000158015
						202.485	0.000246899
						202.485	0.000153077
						202.485	0.000266651
						202.485	0.000138263
						202.485	0.000227147
						202.485	0.000138263
						202.485	0.000241961
						202.485	0.000162953
						203.961	0.000177767
						203.961	0.000222209
						203.961	0.000232085
						203.961	0.000118511
						203.961	0.000207395
						203.961	0.000138263
						203.961	0.000227147
						203.961	0.000158015
						205.183	0.000261713
						205.183	0.000246899
						205.183	0.000261713
						205.183	0.000217271
						205.183	0.000207395
						205.183	0.000128387
						205.183	0.000212333
						205.183	0.000128387
						205.913	0.000222209
						205.913	0.000217271
						205.913	0.000227147
						205.913	0.000158015
						205.913	0.000261713
						205.913	0.000138263
						205.913	0.000197519
						205.913	0.000138263
						206.155	0.000172829
						206.155	0.000202457
						206.155	0.000217271
						206.155	0.000192581
						206.155	0.000256775
						206.155	0.000232085
						206.155	0.000266651
						206.155	0.000187643
						206.155	0.000241961
						206.155	0.000148139
						206.155	0.000232085
						206.155	0.000118511
						206.155	0.000197519
						206.155	0.000138263
						206.155	0.000246899
						206.155	0.000138263
						206.155	0.000207395
						206.155	0.000133325
						206.155	0.000222209
						206.155	0.000123449
						206.155	0.000207395
						206.155	0.000158015
						206.155	0.000222209
						206.155	0.000153077
						208.087	0.000237023
						208.087	0.000232085
						208.087	0.000256775
						208.087	0.000167891
						208.087	0.000232085
						208.087	0.000128387
						208.087	0.000227147
						208.087	0.000113574
						208.806	0.000172829
						208.806	0.000187643
						208.806	0.000232085
						208.806	0.000123449
						208.806	0.000187643
						208.806	0.000133325
						208.806	0.000212333
						208.806	0.000148139
						210	0.000187643
						210	0.000197519
						210	8.88836e-05
						210	0.000123449
						210.238	0.000177767
						210.238	0.000197519
						210.238	0.000207395
						210.238	0.000187643
						210.238	0.000217271
						210.238	0.000133325
						210.238	0.000197519
						210.238	9.38216e-05
						210.238	0.000202457
						210.238	9.38216e-05
						210.238	0.000237023
						210.238	0.000128387
						210.238	0.000172829
						210.238	0.000143201
						210.238	0.000143201
						210.238	0.000108636
						210.95	0.000172829
						210.95	0.000202457
						210.95	0.000202457
						210.95	0.000217271
						210.95	0.000227147
						210.95	0.000153077
						210.95	0.000197519
						210.95	9.87596e-05
						210.95	0.000197519
						210.95	0.000103698
						210.95	0.000241961
						210.95	0.000133325
						210.95	0.000197519
						210.95	0.000123449
						210.95	0.000162953
						210.95	0.000108636
						211.896	0.000172829
						211.896	0.000172829
						211.896	0.000222209
						211.896	0.000128387
						211.896	0.000182705
						211.896	0.000123449
						211.896	0.000192581
						211.896	0.000138263
						212.132	0.000162953
						212.132	0.000192581
						212.132	0.000237023
						212.132	0.000212333
						212.132	0.000197519
						212.132	9.38216e-05
						212.132	0.000187643
						212.132	0.000113574
						212.132	0.000182705
						212.132	0.000118511
						212.132	0.000167891
						212.132	0.000113574
						212.603	0.000237023
						212.603	0.000217271
						212.603	0.000246899
						212.603	0.000177767
						212.603	0.000182705
						212.603	0.000128387
						212.603	0.000197519
						212.603	0.000118511
						213.776	0.000153077
						213.776	0.000177767
						213.776	0.000197519
						213.776	8.39456e-05
						213.776	0.000172829
						213.776	0.000118511
						213.776	0.000167891
						213.776	0.000123449
						214.009	0.000232085
						214.009	0.000207395
						214.009	0.000261713
						214.009	0.000153077
						214.009	0.000202457
						214.009	0.000123449
						214.009	0.000217271
						214.009	0.000108636
						214.709	0.000192581
						214.709	0.000192581
						214.709	0.000197519
						214.709	0.000123449
						214.709	0.000217271
						214.709	0.000123449
						214.709	0.000162953
						214.709	0.000128387
						215.407	0.000177767
						215.407	0.000167891
						215.407	0.000197519
						215.407	0.000123449
						215.407	0.000172829
						215.407	0.000118511
						215.407	0.000167891
						215.407	0.000133325
						215.87	0.000143201
						215.87	0.000162953
						215.87	0.000197519
						215.87	8.39456e-05
						215.87	0.000158015
						215.87	0.000113574
						215.87	0.000162953
						215.87	0.000123449
						216.333	0.000197519
						216.333	0.000202457
						216.333	0.000232085
						216.333	0.000148139
						216.333	0.000217271
						216.333	0.000123449
						216.333	0.000192581
						216.333	0.000113574
						218.403	0.000148139
						218.403	0.000158015
						218.403	0.000192581
						218.403	8.88836e-05
						218.403	0.000148139
						218.403	0.000108636
						218.403	0.000158015
						218.403	0.000123449
						219.317	0.000172829
						219.317	0.000167891
						219.317	0.000222209
						219.317	0.000192581
						219.317	0.000222209
						219.317	0.000172829
						219.317	0.000177767
						219.317	0.000118511
						219.317	0.000162953
						219.317	0.000113574
						219.317	0.000153077
						219.317	0.000123449
						219.317	0.000167891
						219.317	0.000113574
						219.317	0.000143201
						219.317	0.000123449
						219.545	0.000177767
						219.545	0.000182705
						219.545	0.000187643
						219.545	0.000123449
						219.545	0.000202457
						219.545	0.000128387
						219.545	0.000158015
						219.545	0.000118511
						220	0.000148139
						220	0.000172829
						220	8.39456e-05
						220	7.90077e-05
						220.227	0.000143201
						220.227	0.000162953
						220.227	0.000212333
						220.227	0.000187643
						220.227	0.000241961
						220.227	0.000148139
						220.227	0.000172829
						220.227	8.88836e-05
						220.227	0.000167891
						220.227	8.39456e-05
						220.227	0.000177767
						220.227	0.000123449
						220.227	0.000192581
						220.227	0.000108636
						220.227	9.38216e-05
						220.227	7.40697e-05
						220.907	0.000138263
						220.907	0.000167891
						220.907	0.000172829
						220.907	9.38216e-05
						220.907	0.000162953
						220.907	9.38216e-05
						220.907	0.000108636
						220.907	7.90077e-05
						221.359	0.000153077
						221.359	0.000148139
						221.359	0.000177767
						221.359	9.87596e-05
						221.359	0.000138263
						221.359	0.000108636
						221.359	0.000148139
						221.359	0.000118511
						222.036	0.000138263
						222.036	0.000162953
						222.036	0.000187643
						222.036	0.000177767
						222.036	0.000237023
						222.036	0.000143201
						222.036	0.000167891
						222.036	8.39456e-05
						222.036	0.000148139
						222.036	9.87596e-05
						222.036	0.000192581
						222.036	0.000118511
						222.036	0.000182705
						222.036	0.000103698
						222.036	0.000123449
						222.036	8.39456e-05
						223.607	0.000133325
						223.607	0.000153077
						223.607	0.000162953
						223.607	0.000167891
						223.607	0.000158015
						223.607	0.000113574
						223.607	0.000162953
						223.607	7.40697e-05
						223.607	0.000138263
						223.607	0.000103698
						223.607	0.000148139
						223.607	0.000118511
						223.607	0.000133325
						223.607	0.000113574
						223.607	0.000123449
						223.607	8.39456e-05
						224.722	0.000153077
						224.722	0.000148139
						224.722	0.000172829
						224.722	0.000167891
						224.722	0.000187643
						224.722	0.000123449
						224.722	0.000162953
						224.722	0.000103698
						224.722	0.000128387
						224.722	0.000103698
						224.722	0.000187643
						224.722	0.000123449
						224.722	0.000153077
						224.722	0.000113574
						224.722	0.000133325
						224.722	0.000113574
						225.61	0.000128387
						225.61	0.000143201
						225.61	0.000158015
						225.61	7.40697e-05
						225.61	0.000123449
						225.61	9.38216e-05
						225.61	0.000123449
						225.61	8.88836e-05
						226.274	0.000207395
						226.274	0.000162953
						226.274	0.000143201
						226.274	0.000118511
						226.716	0.000197519
						226.716	0.000167891
						226.716	0.000217271
						226.716	0.000143201
						226.716	0.000153077
						226.716	0.000123449
						226.716	0.000158015
						226.716	0.000113574
						228.035	0.000123449
						228.035	0.000133325
						228.035	0.000172829
						228.035	0.000162953
						228.035	0.000222209
						228.035	0.000133325
						228.035	0.000153077
						228.035	7.40697e-05
						228.035	0.000113574
						228.035	8.88836e-05
						228.035	0.000177767
						228.035	0.000118511
						228.035	0.000172829
						228.035	0.000103698
						228.035	0.000118511
						228.035	9.38216e-05
						228.254	0.000153077
						228.254	0.000162953
						228.254	0.000148139
						228.254	0.000113574
						228.254	0.000143201
						228.254	0.000128387
						228.254	0.000128387
						228.254	0.000108636
						228.473	0.000153077
						228.473	0.000153077
						228.473	0.000143201
						228.473	9.87596e-05
						228.473	0.000113574
						228.473	0.000103698
						228.473	0.000118511
						228.473	0.000108636
						230	0.000118511
						230	0.000143201
						230	7.90077e-05
						230	5.43178e-05
						230.217	0.000113574
						230.217	0.000123449
						230.217	0.000167891
						230.217	0.000153077
						230.217	0.000192581
						230.217	0.000123449
						230.217	0.000143201
						230.217	8.39456e-05
						230.217	0.000133325
						230.217	7.90077e-05
						230.217	0.000177767
						230.217	0.000118511
						230.217	0.000148139
						230.217	0.000108636
						230.217	5.92557e-05
						230.217	5.43178e-05
						230.868	0.000113574
						230.868	0.000128387
						230.868	0.000128387
						230.868	0.000128387
						230.868	0.000143201
						230.868	8.39456e-05
						230.868	0.000143201
						230.868	8.39456e-05
						230.868	0.000133325
						230.868	7.90077e-05
						230.868	0.000108636
						230.868	8.88836e-05
						230.868	0.000108636
						230.868	9.87596e-05
						230.868	6.91317e-05
						230.868	5.92557e-05
						231.948	0.000113574
						231.948	0.000128387
						231.948	0.000133325
						231.948	7.90077e-05
						231.948	0.000128387
						231.948	8.39456e-05
						231.948	8.39456e-05
						231.948	6.41937e-05
						232.594	0.000148139
						232.594	0.000153077
						232.594	0.000133325
						232.594	9.87596e-05
						232.594	0.000103698
						232.594	0.000108636
						232.594	0.000113574
						232.594	9.38216e-05
						233.238	0.000153077
						233.238	0.000153077
						233.238	0.000143201
						233.238	0.000113574
						233.238	0.000143201
						233.238	0.000133325
						233.238	0.000123449
						233.238	0.000103698
						233.452	0.000113574
						233.452	0.000113574
						233.452	0.000192581
						233.452	0.000143201
						233.452	0.000202457
						233.452	0.000138263
						233.452	0.000133325
						233.452	7.40697e-05
						233.452	0.000118511
						233.452	8.88836e-05
						233.452	0.000138263
						233.452	0.000113574
						233.452	0.000133325
						233.452	0.000118511
						233.452	9.38216e-05
						233.452	6.41937e-05
						234.094	0.000123449
						234.094	0.000128387
						234.094	0.000133325
						234.094	8.39456e-05
						234.094	0.000103698
						234.094	9.38216e-05
						234.094	9.38216e-05
						234.094	9.38216e-05
						234.307	0.000172829
						234.307	0.000143201
						234.307	0.000207395
						234.307	0.000128387
						234.307	0.000158015
						234.307	0.000113574
						234.307	0.000148139
						234.307	0.000113574
						235.372	0.000113574
						235.372	0.000108636
						235.372	0.000133325
						235.372	7.40697e-05
						235.372	0.000108636
						235.372	8.39456e-05
						235.372	0.000103698
						235.372	6.91317e-05
						236.008	0.000162953
						236.008	0.000138263
						236.008	0.000187643
						236.008	0.000118511
						236.008	0.000162953
						236.008	0.000108636
						236.008	0.000148139
						236.008	0.000103698
						237.065	0.000143201
						237.065	0.000143201
						237.065	0.000128387
						237.065	0.000108636
						237.065	0.000103698
						237.065	0.000118511
						237.065	0.000108636
						237.065	9.38216e-05
						237.697	0.000113574
						237.697	0.000103698
						237.697	0.000128387
						237.697	0.000138263
						237.697	0.000118511
						237.697	8.39456e-05
						237.697	0.000128387
						237.697	7.40697e-05
						237.697	0.000103698
						237.697	7.90077e-05
						237.697	8.88836e-05
						237.697	8.88836e-05
						237.697	8.88836e-05
						237.697	8.39456e-05
						237.697	9.87596e-05
						237.697	7.90077e-05
						238.537	0.000153077
						238.537	0.000138263
						238.537	0.000148139
						238.537	0.000118511
						238.537	0.000143201
						238.537	0.000118511
						238.537	0.000128387
						238.537	9.38216e-05
						240	8.88836e-05
						240	9.38216e-05
						240	7.90077e-05
						240	4.44418e-05
						240.208	8.88836e-05
						240.208	9.87596e-05
						240.208	9.87596e-05
						240.208	7.90077e-05
						240.208	8.88836e-05
						240.208	7.40697e-05
						240.208	4.93798e-05
						240.208	4.93798e-05
						240.416	0.000108636
						240.416	0.000103698
						240.416	0.000192581
						240.416	0.000128387
						240.416	0.000118511
						240.416	7.90077e-05
						240.416	9.38216e-05
						240.416	7.90077e-05
						240.416	0.000128387
						240.416	0.000113574
						240.416	8.88836e-05
						240.416	7.90077e-05
						240.832	8.39456e-05
						240.832	9.87596e-05
						240.832	0.000172829
						240.832	0.000128387
						240.832	0.000202457
						240.832	0.000123449
						240.832	0.000103698
						240.832	8.39456e-05
						240.832	8.88836e-05
						240.832	7.40697e-05
						240.832	0.000138263
						240.832	0.000103698
						240.832	0.000128387
						240.832	0.000118511
						240.832	5.43178e-05
						240.832	4.93798e-05
						241.661	0.000133325
						241.661	0.000138263
						241.661	0.000113574
						241.661	8.39456e-05
						241.661	8.39456e-05
						241.661	8.88836e-05
						241.661	8.39456e-05
						241.661	7.40697e-05
						241.868	8.88836e-05
						241.868	9.87596e-05
						241.868	0.000138263
						241.868	0.000133325
						241.868	0.000123449
						241.868	0.000113574
						241.868	0.000108636
						241.868	7.90077e-05
						241.868	9.38216e-05
						241.868	7.40697e-05
						241.868	0.000113574
						241.868	0.000123449
						241.868	0.000108636
						241.868	8.88836e-05
						241.868	5.92557e-05
						241.868	4.93798e-05
						242.074	0.000153077
						242.074	0.000128387
						242.074	0.000182705
						242.074	0.000113574
						242.074	0.000148139
						242.074	0.000103698
						242.074	0.000133325
						242.074	0.000108636
						243.311	9.38216e-05
						243.311	8.88836e-05
						243.311	0.000113574
						243.311	7.90077e-05
						243.311	9.38216e-05
						243.311	6.91317e-05
						243.311	7.40697e-05
						243.311	4.93798e-05
						243.516	0.000103698
						243.516	0.000108636
						243.516	0.000108636
						243.516	7.90077e-05
						243.516	8.88836e-05
						243.516	8.39456e-05
						243.516	7.40697e-05
						243.516	7.90077e-05
						244.131	0.000153077
						244.131	0.000128387
						244.131	0.000143201
						244.131	0.000113574
						244.131	0.000138263
						244.131	0.000103698
						244.131	0.000133325
						244.131	9.38216e-05
						245.153	9.87596e-05
						245.153	7.90077e-05
						245.153	0.000113574
						245.153	7.40697e-05
						245.153	9.38216e-05
						245.153	6.91317e-05
						245.153	7.90077e-05
						245.153	5.43178e-05
						245.967	0.000133325
						245.967	0.000128387
						245.967	0.000108636
						245.967	9.38216e-05
						245.967	8.88836e-05
						245.967	9.87596e-05
						245.967	8.39456e-05
						245.967	6.91317e-05
						246.982	0.000113574
						246.982	0.000118511
						246.982	0.000138263
						246.982	0.000128387
						246.982	0.000123449
						246.982	0.000113574
						246.982	0.000103698
						246.982	6.91317e-05
						246.982	7.40697e-05
						246.982	7.90077e-05
						246.982	0.000118511
						246.982	0.000118511
						246.982	0.000113574
						246.982	8.39456e-05
						246.982	6.91317e-05
						246.982	7.40697e-05
						247.386	9.87596e-05
						247.386	7.90077e-05
						247.386	0.000113574
						247.386	7.40697e-05
						247.386	8.88836e-05
						247.386	6.91317e-05
						247.386	7.90077e-05
						247.386	6.41937e-05
						247.588	0.000167891
						247.588	0.000118511
						247.588	0.000192581
						247.588	0.000118511
						247.588	0.000123449
						247.588	0.000103698
						247.588	0.000123449
						247.588	0.000118511
						248.395	0.000148139
						248.395	0.000113574
						248.395	0.000182705
						248.395	0.000103698
						248.395	0.000128387
						248.395	9.38216e-05
						248.395	0.000123449
						248.395	0.000118511
						250	6.91317e-05
						250	9.87596e-05
						250	8.88836e-05
						250	0.000148139
						250	0.000118511
						250	0.000148139
						250	0.000108636
						250	9.87596e-05
						250	7.40697e-05
						250	5.92557e-05
						250	6.91317e-05
						250	8.39456e-05
						250	6.91317e-05
						250	0.000123449
						250	9.38216e-05
						250	0.000123449
						250	0.000103698
						250	6.91317e-05
						250	6.91317e-05
						250	3.95038e-05
						250.2	6.91317e-05
						250.2	6.91317e-05
						250.2	6.91317e-05
						250.2	6.91317e-05
						250.2	5.43178e-05
						250.2	6.91317e-05
						250.2	3.95038e-05
						250.2	3.95038e-05
						250.599	0.000123449
						250.599	0.000123449
						250.599	0.000103698
						250.599	0.000103698
						250.599	9.87596e-05
						250.599	0.000103698
						250.599	8.39456e-05
						250.599	7.40697e-05
						250.799	6.41937e-05
						250.799	7.40697e-05
						250.799	0.000118511
						250.799	0.000118511
						250.799	9.87596e-05
						250.799	6.91317e-05
						250.799	7.40697e-05
						250.799	6.91317e-05
						250.799	5.43178e-05
						250.799	6.41937e-05
						250.799	6.91317e-05
						250.799	7.40697e-05
						250.799	6.91317e-05
						250.799	6.91317e-05
						250.799	4.44418e-05
						250.799	3.95038e-05
						251.794	6.41937e-05
						251.794	7.40697e-05
						251.794	7.90077e-05
						251.794	7.40697e-05
[truncated: 604 more rows]
