# Supplementary material for: Rapid regulation of vesicle priming explains synaptic facilitation despite heterogeneous vesicle:Ca2+ channel distances
Source: eLife. 2020 Feb 20;9:e51032. doi: 10.7554/eLife.51032 (PMC7145420; doi:10.7554/eLife.51032)
Supplement: Figure 2—source data 3. [file elife-51032-fig2-data3.xlsx]

## Sheet: Figure 2 - Experiment, EPSC1
17n08020	0.75	1.5	3	6	10				Summary of EPSC1 amplitudes
c1	a1	a1	a1	a1	a1				0.75	1.5	3	6	10
	-38.0381	-68.9786	-103.874	-120.331	-128.986			Average	-19.8657	-47.0426	-81.2378	-92.6605	-98.6492
	-33.2986	-61.1439	-92.5683	-109.155	-112.641			Var	9.15105	17.7597	12.0082	4.82313	5.70645
	-33.0498	-58.2443	-86.0792	-104.56	-111.934			STD	3.02507	4.21422	3.46529	2.19616	2.38882
	-26.6142	-55.4497	-85.486	-102.918	-112.228
	-25.4548	-53.0356	-84.6555	-103.315	-111.938
	-30.4466	-55.0057	-82.616	-100.127	-106.628
	-27.0182	-53.8665	-83.6507	-100.743	-110.443
	-25.2792	-53.12	-82.2761	-102.016	-109.535
	-30.1781	-56.4165	-83.0964	-98.9656	-105.899
	-29.4407	-55.0979	-81.9754	-100.849	-107.132
average	-28.9756	-55.7089	-84.7115	-102.517	-109.82
var	9.32263	6.83087	10.7182	9.1916	6.99602
sd (sqrt of var)	3.0533	2.61359	3.27387	3.03176	2.645
17n17003	0.75	1.5	3	6	10
c4	a1	a1	a1	a1	a1
	-9.44393	-26.0224	-61.9634	-70.6738	-77.7738
	-9.56457	-22.46	-56.3705	-65.9149	-70.72
	-9.08586	-23.5165	-55.1392	-63.0461	-71.3436
	-9.46727	-23.532	-56.7038	-63.1908	-70.7919
	-8.81443	-20.6932	-53.9283	-63.1574	-70.8355
	-7.07326	-18.0061	-55.0385	-64.3829	-70.2801
	-5.98899	-20.9406	-56.5776	-64.2241	-68.2852
	-7.62138	-19.1646	-54.7154	-61.9689	-70.2911
	-8.99072	-23.0988	-53.2779	-64.0709	-70.6341
	-8.43781	-20.2528	-55.3997	-63.5433	-69.8923
average	-8.33825	-21.2961	-55.239	-63.7221	-70.3415
var	1.45413	3.935	1.39145	1.2228	0.764574
sd (sqrt of var)	1.20587	1.98368	1.1796	1.1058	0.8744
17n17051	0.75	1.5	3	6	10
c5	a1	a1	a1	a1	a1
	-10.9401	-58.9478	-97.9444	-109.218	-127.498
	-9.13577	-60.0759	-89.1438	-101.684	-115.551
	-12.7404	-55.4021	-84.9769	-101.265	-112.737
	-10.3791	-49.6666	-87.2354	-101.924	-114.747
	-11.059	-46.3235	-87.0833	-106.556	-110.193
	-12.6829	-52.3848	-86.9902	-105.157	-107.987
	-8.82724	-49.2617	-88.3869	-108.171	-107.078
	-12.2842	-53.9807	-89.5752	-105.498	-110.022
	-15.1202	-52.4275	-87.4552	-104.072	-102.689
	-9.55499	-53.8932	-88.1411	-106.598	-108.439
average	-11.3093	-52.6018	-87.6653	-104.547	-109.938
var	4.28734	15.8174	1.85399	6.09051	16.1631
sd (sqrt of var)	2.07059	3.97711	1.36161	2.4679	4.02034
17n23071	0.75	1.5	3	6	10
c6	a1	a1	a1	a1	a1
	-24.135	-29.1482	-99.0494	-104.98	-110.275
	-18.2745	-28.2295	-91.0284	-94.2799	-99.4842
	-14.8344	-30.8086	-89.4935	-93.8285	-95.6782
	-18.6211	-31.6843	-85.353	-88.1297	-95.624
	-22.4255	-37.5688	-86.3445	-91.5655	-95.7711
	-20.279	-34.9445	-84.8244	-92.832	-93.6106
	-12.7721	-41.5051	-82.6387	-91.4471	-96.4762
	-15.6122	-39.8092	-84.5897	-91.7324	-95.5554
	-14.9013	-44.8982	-80.7083	-90.8015	-97.4388
	-14.6658	-34.8396	-80.3536	-85.508	-95.7021
average	-16.9318	-36.032	-85.0371	-91.125	-96.149
var	9.84275	29.3578	13.0294	7.68376	2.56623
sd (sqrt of var)	3.13732	5.41829	3.60962	2.77196	1.60195
17n23020	0.75	1.5	3	6	10
c7	a1	a1	a1	a1	a1
	-19.3881	-58.3043	-108.981	-107.287	-112.135
	-21.1166	-46.6652	-100.515	-97.8121	-102.096
	-18.7993	-47.9006	-95.4248	-95.4762	-100.899
	-14.2287	-40.9649	-88.7936	-96.8537	-99.7056
	-19.3735	-44.2652	-90.4016	-95.1983	-98.3798
	-16.2533	-49.8134	-85.5762	-93.9544	-98
	-13.1862	-51.3307	-88.5934	-93.8507	-96.9492
	-18.0549	-49.9791	-86.1952	-93.6236	-97.9296
	-13.0959	-57.5954	-82.5359	-95.2676	-100.755
	-16.7758	-57.9312	-82.2079	-93.1738	-100.172
average	-16.7649	-49.6051	-88.9159	-95.0234	-99.4317
var	8.06349	31.3808	35.4352	2.41508	2.89987
sd (sqrt of var)	2.83963	5.60185	5.95275	1.55405	1.7029
17n22059	0.75	1.5	3	6	10
c8	a1	a1	a1	a1	a1
	-47.8064	-80.0326	-103.145	-109.475	-120.995
	-45.5771	-71.0726	-90.4211	-101.629	-110.146
	-39.9647	-72.9067	-88.598	-99.3841	-108.145
	-38.2053	-71.3053	-90.3521	-98.8911	-106.115
	-38.6994	-69.3654	-84.3992	-98.5462	-106.224
	-38.2979	-63.6653	-85.0639	-98.9829	-106.359
	-29.7738	-65.0999	-84.1579	-99.4521	-101.919
	-32.183	-66.8572	-84.1548	-97.5688	-105.988
	-34.3097	-60.649	-83.5022	-96.3469	-105.285
	-34.8579	-62.1836	-82.071	-100.455	-105.756
average	-36.8743	-67.0117	-85.8578	-99.0285	-106.215
var	21.9359	19.2362	9.621	2.33502	4.84887
sd (sqrt of var)	4.68358	4.38591	3.10177	1.52808	2.20201

## Sheet: Figure 2 - Experiment, EPSC2
17n08020	0.75	1.5	3	6	10				Summary of EPSC2 amplitudes
c1	a1	a1	a1	a1	a1				0.75	1.5	3	6	10
	-44.6038	-66.2846	-75.8497	-88.1616	-89.9127			Average	-31.1291	-50.1997	-64.5109	-68.0051	-68.2375
	-36.6206	-59.5964	-79.3849	-90.2556	-94.938			Var	8.47323	16.1876	4.93216	7.75175	27.9758
	-37.3604	-66.8476	-79.8384	-94.1086	-91.0151			STD	2.91088	4.02338	2.22085	2.7842	5.28922
	-42.4023	-64.1662	-76.8348	-91.8999	-92.2666
	-47.3395	-61.506	-79.4458	-90.0597	-89.7845
	-45.6392	-60.6343	-81.1259	-88.7896	-90.9151
	-41.1832	-67.0503	-79.1376	-87.7386	-87.8139
	-41.359	-62.3847	-79.0894	-92.8896	-90.0159
	-38.454	-56.5654	-74.6205	-87.2023	-88.9952
	-39.5515	-64.7347	-79.0409	-85.3156	-90.5636
average	-41.1011	-62.6095	-78.7242	-89.8066	-90.7009
var	13.0943	11.9252	3.59775	8.11529	4.14017
sd (sqrt of var)	3.61861	3.45329	1.89677	2.84874	2.03474
17n17003	0.75	1.5	3	6	10
c4	a1	a1	a1	a1	a1
	-18.4647	-32.5717	-47.5624	-49.3096	-49.9439
	-17.7634	-33.596	-49.174	-50.3786	-52.1366
	-18.8739	-30.3715	-46.8944	-50.4507	-50.9228
	-18.1895	-29.0482	-47.7679	-51.9206	-55.3926
	-19.3381	-29.7841	-47.0632	-51.4859	-52.355
	-22.2054	-27.2533	-48.6538	-50.6924	-53.293
	-20.0881	-28.5004	-48.394	-51.179	-53.0971
	-22.6214	-31.0274	-49.1631	-50.4788	-52.4138
	-15.6305	-28.6966	-48.9426	-49.779	-52.8229
	-15.5741	-31.3459	-45.7611	-49.6804	-51.7352
average	-18.9205	-29.9582	-47.9793	-50.6717	-52.6855
var	6.24034	3.54559	1.4206	0.55398	1.54757
sd (sqrt of var)	2.49807	1.88297	1.19189	0.744299	1.24401
17n17051	0.75	1.5	3	6	10
c5	a1	a1	a1	a1	a1
	-22.4017	-62.6396	-76.3586	-79.6791	-75.9422
	-20.7342	-61.0825	-79.2378	-78.5303	-89.0419
	-22.4807	-58.2246	-74.0735	-80.4125	-86.8746
	-21.4145	-59.8059	-77.3074	-79.2879	-79.8684
	-24.9052	-59.1198	-76.6827	-77.5295	-84.3865
	-18.1836	-56.9044	-74.3271	-82.0119	-85.2041
	-19.5568	-58.7587	-76.8625	-81.0759	-84.2226
	-16.5819	-59.7283	-72.3378	-78.8193	-82.3427
	-20.4497	-53.3642	-71.708	-76.0277	-86.0724
	-24.216	-48.988	-72.5553	-75.7164	-84.6843
average	-20.9469	-57.3307	-75.0102	-78.8235	-84.7442
var	7.23007	14.6881	6.8493	4.65134	6.86611
sd (sqrt of var)	2.68888	3.8325	2.61712	2.1567	2.62033
17n23071	0.75	1.5	3	6	10
c6	a1	a1	a1	a1	a1
	-34.8659	-45.2422	-72.0179	-65.3984	-71.4585
	-41.0363	-47.4782	-64.1035	-70.8845	-72.1361
	-37.5804	-39.6751	-64.6873	-66.6775	-61.3539
	-32.9035	-46.5899	-68.7595	-65.9331	-65.0943
	-31.6394	-43.8484	-69.0114	-63.5444	-67.0668
	-33.417	-50.0666	-70.7899	-66.3497	-63.259
	-35.3974	-42.1283	-72.2117	-68.0987	-50.2514
	-34.4842	-53.3667	-67.3686	-61.2708	-43.4044
	-35.1551	-52.785	-67.6856	-63.0844	-66.3753
	-34.9247	-51.5646	-69.6914	-71.6034	-60.059
average	-35.1709	-47.5003	-68.2565	-66.3829	-61
var	7.68522	23.7132	7.00551	11.9779	79.7156
sd (sqrt of var)	2.77222	4.86962	2.64679	3.46092	8.92836
17n23020	0.75	1.5	3	6	10
c7	a1	a1	a1	a1	a1
	-28.6923	-55.23	-73.1127	-60.3462	-66.9376
	-34.057	-56.8565	-74.1028	-67.1101	-66.0394
	-29.9685	-50.7539	-73.997	-65.8532	-65.6519
	-27.4666	-56.7454	-72.8515	-63.9186	-69.991
	-30.311	-56.6187	-71.0047	-63.9158	-64.4281
	-25.5669	-57.9093	-67.6622	-63.0574	-68.9755
	-31.0493	-57.3349	-68.8443	-59.3935	-68.6787
	-32.6602	-57.0499	-66.1222	-59.3751	-63.291
	-27.8049	-59.9526	-67.5335	-62.669	-64.804
	-29.2116	-58.6292	-70.7897	-67.1042	-68.3716
average	-29.7884	-56.8723	-70.3231	-63.5996	-66.6923
var	6.98032	6.4264	8.69441	8.32298	5.57878
sd (sqrt of var)	2.64203	2.53503	2.94863	2.88496	2.36194
17n22059	0.75	1.5	3	6	10
c8	a1	a1	a1	a1	a1
	-42.9429	-53.6747	-49.8809	-59.7863	-57.3129
	-42.5438	-53.428	-47.8915	-56.9346	-60.6065
	-44.6825	-52.3654	-45.1554	-64.9271	-57.8803
	-44.4697	-54.8692	-46.7119	-60.839	-54.1913
	-41.0687	-46.7298	-48.9509	-52.7571	-53.4727
	-40.0117	-40.8115	-48.1193	-60.8134	-48.0263
	-40.8399	-44.1707	-44.9064	-57.4596	-55.2756
	-34.2752	-49.0064	-47.3848	-59.149	-36.5767
	-40.2524	-44.17	-45.444	-60.5571	-50.2452
	-39.4796	-36.791	-46.3843	-55.2812	-66.1442
average	-40.847	-46.9269	-46.7721	-58.7464	-53.6021
var	9.60912	36.8271	2.02537	12.889	70.0068
sd (sqrt of var)	3.09986	6.06853	1.42315	3.59012	8.36701

## Sheet: Figure 2 - Experiment, PPR
17n08020	0.75	1.5	3	6	10				Summary of PPR values
c1	a1	a1	a1	a1	a1				0.75	1.5	3	6	10
	1.17261	0.960944	0.730206	0.732658	0.697074			Average	1.79599	1.13883	0.799625	0.736368	0.692788
	1.09976	0.97469	0.857581	0.82686	0.84284			Var	0.158506	0.016456	0.00145212	0.00110635	0.00284531
	1.13043	1.14771	0.927499	0.900044	0.813114			STD	0.398128	0.128281	0.0381067	0.0332618	0.0533415
	1.59322	1.1572	0.8988	0.892939	0.822135
	1.85975	1.15971	0.938459	0.871701	0.802092
	1.49899	1.10233	0.981964	0.886766	0.852637
	1.52428	1.24475	0.946048	0.870912	0.795108
	1.63609	1.17441	0.961268	0.91054	0.821797
	1.27424	1.00264	0.897999	0.881137	0.84038
	1.34343	1.1749	0.964204	0.845977	0.845347
average	1.44002	1.12648	0.930425	0.876319	0.826161
var	0.0621374	0.00751108	0.00155294	0.000694998	0.000412313
sd (sqrt of var)	0.249274	0.0866665	0.0394073	0.0263628	0.0203055
17n17003	0.75	1.5	3	6	10
c4	a1	a1	a1	a1	a1
	1.95519	1.25168	0.767589	0.697707	0.642169
	1.8572	1.49582	0.872336	0.764297	0.737226
	2.07729	1.2915	0.850474	0.80022	0.713767
	1.92131	1.23441	0.84241	0.821648	0.782471
	2.19392	1.43932	0.8727	0.815201	0.739107
	3.13934	1.51356	0.883995	0.787358	0.758295
	3.35417	1.36102	0.855357	0.796882	0.777579
	2.96815	1.619	0.898524	0.814583	0.745668
	1.73851	1.24234	0.918628	0.776937	0.747839
	1.84575	1.54773	0.826018	0.781835	0.740214
average	2.34396	1.41608	0.868938	0.79544	0.74913
var	0.395842	0.0195814	0.000833506	0.000378918	0.000448851
sd (sqrt of var)	0.62916	0.139934	0.0288705	0.0194658	0.0211861
17n17051	0.75	1.5	3	6	10
c5	a1	a1	a1	a1	a1
	2.04766	1.06263	0.779612	0.729539	0.595633
	2.26956	1.01675	0.888876	0.772294	0.770587
	1.76452	1.05095	0.87169	0.794079	0.770595
	2.06323	1.20415	0.886193	0.777914	0.696042
	2.25203	1.27624	0.880567	0.727594	0.765805
	1.43371	1.08628	0.854431	0.779898	0.789019
	2.2155	1.19279	0.869614	0.749518	0.786552
	1.34985	1.10647	0.807565	0.74712	0.748419
	1.35247	1.01787	0.81994	0.730529	0.838182
	2.53438	0.908984	0.823172	0.710296	0.780939
average	1.91503	1.09561	0.855783	0.75436	0.771793
var	0.203166	0.0128927	0.000969193	0.000801002	0.00141613
sd (sqrt of var)	0.450739	0.113546	0.0311319	0.028302	0.0376315
17n23071	0.75	1.5	3	6	10
c6	a1	a1	a1	a1	a1
	1.44462	1.55214	0.727091	0.62296	0.648005
	2.24555	1.68187	0.704215	0.751852	0.725101
	2.53333	1.28779	0.722816	0.710632	0.641252
	1.767	1.47044	0.805589	0.748137	0.680731
	1.41087	1.16715	0.799257	0.693977	0.700282
	1.64786	1.43274	0.834546	0.714729	0.675768
	2.77145	1.01501	0.873824	0.744679	0.520869
	2.2088	1.34056	0.796416	0.66793	0.454233
	2.35919	1.17566	0.838645	0.69475	0.6812
	2.38137	1.48006	0.867309	0.837389	0.627562
average	2.14727	1.33903	0.804735	0.729342	0.634111
var	0.198513	0.0409154	0.0034553	0.00244395	0.00800722
sd (sqrt of var)	0.445548	0.202276	0.0587818	0.0494363	0.0894831
17n23020	0.75	1.5	3	6	10
c7	a1	a1	a1	a1	a1
	1.47989	0.947272	0.670875	0.562474	0.59694
	1.61281	1.21839	0.737233	0.686112	0.646839
	1.59413	1.05957	0.775448	0.689734	0.650667
	1.93036	1.38522	0.820459	0.65995	0.701977
	1.56456	1.27908	0.785437	0.671396	0.654892
	1.57303	1.16252	0.790666	0.671148	0.703831
	2.35468	1.11697	0.777081	0.632851	0.708399
	1.80894	1.14148	0.767122	0.634189	0.646291
	2.12318	1.04093	0.818231	0.65782	0.643184
	1.74129	1.01205	0.861106	0.720205	0.682545
average	1.81144	1.15736	0.792532	0.669267	0.670958
var	0.0769789	0.0145759	0.00130385	0.000759975	0.000776292
sd (sqrt of var)	0.277451	0.120731	0.0361088	0.0275676	0.027862
17n22059	0.75	1.5	3	6	10
c8	a1	a1	a1	a1	a1
	0.898265	0.670661	0.483598	0.546119	0.47368
	0.933448	0.751739	0.52965	0.560218	0.550237
	1.11805	0.718252	0.509666	0.653295	0.535209
	1.16397	0.769496	0.516998	0.615212	0.510685
	1.06122	0.673676	0.579993	0.535354	0.503396
	1.04475	0.641032	0.565685	0.614383	0.451548
	1.37167	0.678508	0.533597	0.577761	0.542346
	1.06501	0.733001	0.563067	0.606229	0.345103
	1.17321	0.728289	0.544226	0.628532	0.477231
	1.13259	0.591652	0.565173	0.550309	0.625441
average	1.11821	0.698405	0.545339	0.593477	0.504578
var	0.0143975	0.00325971	0.000597942	0.00155925	0.00601107
sd (sqrt of var)	0.119989	0.0570938	0.0244528	0.0394874	0.0775311

## Sheet: Figure 2 - figure supplement 3
Figure 2 – figure supplement 1 - source data
0.75 mM, WT
Cell name	eEJC1	eEJC2 (extrapolation)	PPR (extrapolation)		eEJC2 (baseline)	PPR (baseline)
'0155'	-24.3421	-49.2693	2.02403		-45.5017	1.86926
'0167'	-33.3269	-28.7294	0.862047		-24.5056	0.735309
'0179'	-22.1655	-19.6566	0.886811		-16.8762	0.761374
'0191'	-30.3461	-25.6161	0.844131		-22.3389	0.736135
'0203'	-16.1099	-15.3462	0.952598		-15.0146	0.932015
'0217'	-84.5205	-46.2542	0.547254		-33.8135	0.400063
Mean	-35.1352	-30.812	1.01948		-26.3418	0.905692
VAR	622.355	194.82	0.261946		132.045	0.252684
SD	24.9471	13.9578	0.511807		11.4911	0.502676
0.75 mM, OK
Cell name	eEJC1	eEJC2 (extrapolation)	PPR (extrapolation)		eEJC2 (baseline)	PPR (baseline)
'0003'	-34.7057	-43.0468	1.24034		-40.4053	1.16423
'0027'	-30.6483	-26.0914	0.851316		-23.0103	0.750784
'0039'	-25.5715	-28.0462	1.09678		-25.6653	1.00367
'0066'	-24.2404	-38.6926	1.5962		-35.5835	1.46794
'0078'	-36.2292	-47.115	1.30047		-44.9219	1.23993
'0104'	-22.3811	-29.3041	1.30932		-26.7029	1.1931
'0119'	-50.4381	-41.5675	0.824129		-36.4075	0.721825
'0131'	-34.7158	-33.413	0.962472		-29.9683	0.863246
Mean	-32.3663	-35.9096	1.14763		-32.8331	1.05059
VAR	81.0512	60.622	0.0698057		59.6386	0.0683608
SD	9.00285	7.78601	0.264208		7.7226	0.261459
1.5 mM, WT
Cell name	eEJC1	eEJC2 (extrapolation)	PPR (extrapolation)		eEJC2 (baseline)	PPR (baseline)
'0075'	-85.1852	-49.3747	0.579616		-41.1987	0.483637
'0090'	-105.192	-59.0993	0.561826		-48.3398	0.459541
'0161'	-106.587	-59.5573	0.558766		-55.5725	0.52138
'0178'	-87.9067	-62.1546	0.707052		-60.73	0.690846
'0190'	-106.346	-88.717	0.834228		-80.3833	0.755864
Mean	-98.2434	-63.7806	0.648297		-57.2449	0.582254
VAR	115.23	217.938	0.0145582		221.777	0.0176055
SD	10.7345	14.7627	0.120657		14.8922	0.132686
1.5 mM, OK
Cell name	eEJC1	eEJC2 (extrapolation)	PPR (extrapolation)		eEJC2 (baseline)	PPR (baseline)
'0047'	-81.1419	-41.4148	0.5104		-36.1023	0.444928
'0059'	-94.1842	-58.6624	0.622848		-53.1311	0.564119
'0114'	-81.5921	-45.9764	0.56349		-39.4897	0.48399
'0126'	-99.5649	-51.6039	0.518295		-46.051	0.462523
'0138'	-109.645	-79.4676	0.724772		-73.3643	0.669107
Mean	-93.2256	-55.425	0.587961		-49.6277	0.524933
VAR	148.014	222.173	0.00785057		218.551	0.00857348
SD	12.1661	14.9055	0.0886034		14.7835	0.0925931
