# Supplementary material for: Rapid regulation of vesicle priming explains synaptic facilitation despite heterogeneous vesicle:Ca2+ channel distances
Source: eLife. 2020 Feb 20;9:e51032. doi: 10.7554/eLife.51032 (PMC7145420; doi:10.7554/eLife.51032)
Supplement: Figure 3—source data 1. [file elife-51032-fig3-data1.xlsx]

## Sheet: Figure 3A
Figure 3A - source data
	1-NND (µm)	2-NND (µm)	3-NND (µm)	4-NND (µm)	1-4-NND (µm)
avg	0.6881	0.9907	1.254	1.492	1.106
SD	0.07959	0.1001	0.1255	0.1471	0.1104
sem	0.0193	0.02428	0.03044	0.03567	0.02678
N	17	17	17	17	17
	Individual distance measurements (µm)
AZ number	1-NND	2-NND	3-NND	4-NND	Average (individual points in bottom right plot Fig. 2a)
1	0.73024	1.01078	1.25708	1.50222	1.12508
2	0.703904	1.05045	1.3163	1.60229	1.16824
3	0.81195	1.1175	1.38368	1.67264	1.24644
4	0.725622	1.06471	1.41441	1.66714	1.21797
5	0.562274	0.868867	1.1221	1.31898	0.968056
6	0.662562	0.955966	1.20287	1.43632	1.06443
7	0.688545	0.999925	1.31862	1.57532	1.1456
8	0.777042	1.09076	1.36241	1.60234	1.20814
9	0.639735	0.93775	1.21711	1.46126	1.06396
10	0.596502	0.838081	1.04522	1.2268	0.926649
11	0.728643	1.05107	1.32566	1.58082	1.17155
12	0.663663	0.897291	1.12577	1.33659	1.00583
13	0.817341	1.12486	1.39027	1.59607	1.23213
14	0.578121	0.85575	1.14205	1.38121	0.989285
15	0.757067	1.11877	1.39544	1.63623	1.22688
16	0.67432	1.00079	1.26934	1.53379	1.11956
17	0.581	0.858638	1.02655	1.22853	0.92368

## Sheet: Figure 3 – figure supplement 1
Figure 3 – figure supplement 1 - source data
Result summary:
Average of dF over 5 cells and 5 Ca2+-concentrations:
[Ca2+]ext	average dF	S.E.M.
0 (5 mM EGTA)	0.244	0.088
0.75	0.556	0.098
1.5	1.51	0.356
3	3.144	0.736
6	4.91	0.75
Results of Hill curve fit:
Parameter	Value±S.E.M.	Unit/Description
KM	2.679±0.6351	Fluorescence (a.u.); [Ca2+]ext at half maximal fluorescence
Fend	5.176±0.7676	Fluorescence (a.u.); Asymptotic plateau of fluorescence
Hill coefficient h	2.43	unitless; Ca2+ cooperativity of GCaMP6m; (Barnett et al., 2017)
C	0.3294±0.3556	Fluorescence (a.u.); baseline of fluorescence
Single cell data points (panel D)
[Ca2+]extracellular	Cell 1	Cell 2	Cell 3	Cell 4	Cell 5
0.00005 (EGTA)	-0.057205	0.17221	0.312623	0.32489	0.46513
0.75	0.321845	0.43247	0.44901	0.80691	0.76981
1.5	0.875179	0.96669	1.17363	2.80494	1.73162
3	1.39406	2.3703	2.47237	5.63868	3.84499
6	2.61143	4.93273	4.0858	6.95005	5.9716
