# Supplementary material for: Rapid regulation of vesicle priming explains synaptic facilitation despite heterogeneous vesicle:Ca2+ channel distances
Source: eLife. 2020 Feb 20;9:e51032. doi: 10.7554/eLife.51032 (PMC7145420; doi:10.7554/eLife.51032)
Supplement: Figure 4—source data 1. [file elife-51032-fig4-data1.xlsx]

## Sheet: Figure 4
Figure 4 C,G,E - source data
Simulation results, single sensor model
EPSC1	Extr. Ca2+ (mM)	0.75	1	1.25	1.5	1.75	2	2.5	3	3.5	4	4.5	5	5.5	6	6.5	7	7.5	8	8.5	9	9.5	10
	Average	28.2639	37.2522	44.3462	50.6894	55.7022	60.297	67.6192	72.958	77.3823	80.3545	83.4592	85.5544	87.4573	89.3081	90.6521	91.7128	92.7375	94.0794	94.9781	95.6735	96.3525	96.9319
	Var	13.3976	17.3659	17.4695	18.5118	19.5209	20.2478	19.335	18.5652	19.8999	18.6311	19.5402	17.7483	20.8055	18.4257	18.4471	18.7746	17.8958	17.3131	17.5869	17.875	17.7647	16.9786
	SD	3.66027	4.16724	4.17965	4.30253	4.41825	4.49975	4.39716	4.30874	4.46093	4.31637	4.42043	4.21287	4.56131	4.29252	4.29501	4.33297	4.23034	4.16091	4.19367	4.22788	4.21482	4.12051
PPR
	Average	0.847739	0.836128	0.836716	0.829143	0.826705	0.823765	0.817275	0.815945	0.808602	0.807515	0.80694	0.803914	0.80365	0.799649	0.799843	0.799224	0.801196	0.800135	0.794101	0.795062	0.791082	0.793542
	Var	0.0197548	0.0134711	0.00993904	0.00830185	0.00715935	0.00685975	0.00502978	0.00423223	0.00407677	0.00360327	0.00374634	0.00366217	0.00331798	0.00350628	0.00322592	0.00315544	0.00274146	0.00305347	0.00295454	0.00276864	0.0028144	0.00277399
	SD	0.140552	0.116065	0.0996948	0.0911145	0.0846129	0.0828236	0.070921	0.0650556	0.0638496	0.0600272	0.0612074	0.0605158	0.0576019	0.0592138	0.0567971	0.0561733	0.0523589	0.0552582	0.0543557	0.0526178	0.053051	0.0526687
Green shading indicates experimental calcium concentrations. These values are part of the evaluation of the fit (cost value)

## Sheet: Figure 4 – figure supplement 1
Figure 4 – figure supplement 1 - source data
Qmax (fC)	PPR (deterministic, no replenishment	PPR (stochastic, no replenishment)	PPR (deterministic, no replenishment	PPR (stochastic, no replenishment)
0.25	0.927753	Too many failures, not plotted	0.933225	Too many failures, not plotted
0.3	0.926385	Too many failures, not plotted	0.936378	Too many failures, not plotted
0.35	0.920161	Too many failures, not plotted	0.936816	Too many failures, not plotted
0.4	0.910966	Too many failures, not plotted	0.935401	Too many failures, not plotted
0.45	0.899462	Too many failures, not plotted	0.933781	Too many failures, not plotted
0.5	0.885154	Too many failures, not plotted	0.931612	Too many failures, not plotted
0.9	0.741074	Too many failures, not plotted	0.903352	Too many failures, not plotted
1.3	0.625205	Too many failures, not plotted	0.881411	Too many failures, not plotted
1.7	0.558072	0.755517	0.86925	1.11472
2.1	0.518086	0.643898	0.862602	0.980038
2.5	0.490849	0.5654	0.858328	0.950883
2.9	0.470479	0.546506	0.855293	0.942499
3.3	0.453938	0.49859	0.853029	0.895928
3.7	0.439981	0.47241	0.851162	0.886674
4.1	0.427751	0.468551	0.849649	0.86794
4.5	0.416787	0.430481	0.84837	0.872679
4.9	0.40673	0.422477	0.847166	0.870629
5.3	0.397427	0.411466	0.846073	0.867124
5.7	0.388649	0.409205	0.845033	0.855417
6.1	0.380285	0.40037	0.844055	0.862605
6.5	0.372277	0.389835	0.843112	0.856946
6.9	0.364546	0.371968	0.842134	0.853419
7.3	0.357045	0.367745	0.841247	0.859343
7.7	0.349809	0.355338	0.840347	0.854807
8.1	0.342706	0.35893	0.839425	0.847408
8.5	0.335806	0.344955	0.838526	0.851449
8.9	0.329026	0.338542	0.837671	0.851856
9.3	0.322351	0.330906	0.836773	0.849234
9.7	0.315825	0.321749	0.835827	0.844557
10.1	0.309419	0.319594	0.834923	0.844656
10.5	0.303107	0.308435	0.834023	0.846114
10.9	0.296893	0.301849	0.833092	0.842279
11.3	0.290788	0.301868	0.832195	0.83777
11.7	0.284778	0.289477	0.831323	0.843771
12.1	0.278845	0.283845	0.830425	0.833019
12.5	0.273014	0.27814	0.8295	0.835516
12.9	0.267247	0.273563	0.828563	0.833501
13.3	0.261633	0.269238	0.827694	0.828629
13.7	0.256004	0.259776	0.826774	0.83779
14.1	0.250513	0.252554	0.825868	0.832815
14.5	0.245092	0.24638	0.824947	0.829407
14.9	0.239775	0.244883	0.824021	0.826497
