# Supplementary material for: Rapid regulation of vesicle priming explains synaptic facilitation despite heterogeneous vesicle:Ca2+ channel distances
Source: eLife. 2020 Feb 20;9:e51032. doi: 10.7554/eLife.51032 (PMC7145420; doi:10.7554/eLife.51032)
Supplement: Figure 6—source data 1. [file elife-51032-fig6-data1.xlsx]

## Sheet: Figure 6
Figure 6 B,E,G,I - source data
Simulation results, dual fusion-sensor model (figure 6 E,G,I)
eEJC1	Extr. Ca2+ (mM)	0.75	1	1.25	1.5	1.75	2	2.5	3	3.5	4	4.5	5	5.5	6	6.5	7	7.5	8	8.5	9	9.5	10
	Average	26.246	34.8674	42.3422	48.6087	54.185	58.9627	66.6217	72.7042	77.212	81.3732	84.2368	87.2806	89.4786	91.2704	92.962	94.4081	95.9056	96.7719	98.0895	99.1214	100.013	100.919
	Var	13.3347	18.621	19.8408	21.6973	23.0816	24.2979	24.7216	25.2583	24.6702	27.5541	25.9269	25.3338	27.0111	26.6565	24.7238	26.4032	27.615	23.1188	26.1516	24.495	25.9657	26.4436
	SD	3.65167	4.31521	4.4543	4.65803	4.80433	4.92929	4.97208	5.02577	4.96691	5.2492	5.09185	5.03327	5.19722	5.16299	4.9723	5.13841	5.255	4.80821	5.11386	4.94924	5.09565	5.14234
PPR
	Average	1.08341	1.03784	0.990719	0.960435	0.939687	0.913628	0.884023	0.852112	0.829027	0.812471	0.799054	0.784452	0.777368	0.768997	0.757384	0.751166	0.743307	0.743741	0.734817	0.731843	0.728164	0.720752
	Var	0.0341666	0.0233254	0.0174908	0.0150725	0.0132228	0.0125308	0.00912789	0.00781209	0.00780833	0.00717371	0.00692076	0.00607034	0.00666682	0.00653665	0.00577856	0.00542803	0.00555541	0.00510972	0.00577505	0.00500698	0.00554263	0.00487447
	SD	0.184842	0.152727	0.132253	0.12277	0.11499	0.111941	0.09554	0.088386	0.0883648	0.0846978	0.0831911	0.0779124	0.0816506	0.0808495	0.0760169	0.0736751	0.0745346	0.0714823	0.0759937	0.07076	0.0744488	0.0698174
Simulation results, rate exploration (figure 6 B)
PPR	k_on	1000000	5000000	10000000	40000000	80000000
	Average	0.886163	1.00966	1.0694	1.08858	0.973021
	SD	0.230578	0.242006	0.228851	0.190028	0.153549
Green shading indicates experimental calcium concentrations. These values are part of the evaluation of the fit (cost value)

## Sheet: Figure 6 - figure supplement 1
Figure 6 - figure supplement 1 - source data
Simulation results, dual fusion-sensor model, cooperativity 5
eEJC1	Extr. Ca2+ (mM)	0.75	1	1.25	1.5	1.75	2	2.5	3	3.5	4	4.5	5	5.5	6	6.5	7	7.5	8	8.5	9	9.5	10
	Average	24.182	32.2387	39.4147	45.5451	51.0306	55.9005	63.687	70.2611	75.7827	80.189	84.1254	87.1256	90.2115	92.0701	94.6958	96.6892	98.1761	99.5391	101.423	102.852	104.233	104.733
	Var	14.5645	20.9021	24.4336	27.7702	31.9557	31.1093	41.3157	44.9245	44.0902	48.2184	47.9026	53.9257	56.3104	54.4863	61.0362	56.8581	57.9809	57.0211	63.711	59.9501	61.1269	59.9587
	SD	3.81634	4.57188	4.94304	5.26975	5.65294	5.57757	6.42773	6.70257	6.64004	6.94394	6.92117	7.34341	7.50403	7.38149	7.81257	7.54043	7.61452	7.55123	7.98192	7.74274	7.81837	7.7433
PPR
	Average	1.27538	1.22057	1.17967	1.12433	1.09547	1.05674	1.0063	0.950309	0.908842	0.872392	0.835418	0.816759	0.790824	0.779455	0.761209	0.743961	0.726631	0.727145	0.705641	0.698887	0.686813	0.678915
	Var	0.0564318	0.0448943	0.0399395	0.0349254	0.032364	0.0275834	0.0280948	0.0289704	0.0243826	0.0256479	0.0227532	0.0221502	0.0221657	0.0196487	0.0207965	0.0198113	0.0192802	0.0187479	0.0168176	0.0167651	0.0166527	0.0161324
	SD	0.237554	0.211883	0.199849	0.186883	0.1799	0.166082	0.167615	0.170207	0.156149	0.16015	0.150842	0.148829	0.148882	0.140174	0.14421	0.140753	0.138853	0.136923	0.129683	0.12948	0.129045	0.127013
Green shading indicates experimental calcium concentrations. These values are part of the evaluation of the fit (cost value)
