# Supplementary material for: Rapid regulation of vesicle priming explains synaptic facilitation despite heterogeneous vesicle:Ca2+ channel distances
Source: eLife. 2020 Feb 20;9:e51032. doi: 10.7554/eLife.51032 (PMC7145420; doi:10.7554/eLife.51032)
Supplement: Figure 7—source data 1. [file elife-51032-fig7-data1.xlsx]

## Sheet: Figure 7
Data Figure 7 E,G,I - source data
Simulation results, unpriming model (figure 7 E,G,I)
eEJC1	Extr. Ca2+ (mM)	0.75	1	1.25	1.5	1.75	2	2.5	3	3.5	4	4.5	5	5.5	6	6.5	7	7.5	8	8.5	9	9.5	10
	Average	19.7037	28.3347	38.1247	47.599	55.671	62.5114	72.1498	78.8385	83.0751	86.3786	89.0325	90.9102	92.2916	93.6542	94.898	95.6589	96.505	97.2064	97.9315	98.3251	98.7089	99.0256
	Var	10.458	12.2003	14.6634	17.4092	16.3888	17.1181	15.2727	14.3195	13.2759	14.1281	12.5981	12.1995	10.7266	11.2695	10.3638	10.2837	10.3243	10.1621	9.41016	9.75399	9.26957	9.15324
	SD	3.23388	3.4929	3.82928	4.17244	4.04831	4.1374	3.90803	3.78411	3.64361	3.75874	3.54938	3.49277	3.27514	3.35701	3.21929	3.20682	3.21315	3.18781	3.0676	3.12314	3.0446	3.02543
PPR
	Average	1.67109	1.42574	1.19909	1.04886	0.958039	0.889668	0.819404	0.783209	0.763715	0.74774	0.740388	0.733293	0.727256	0.722255	0.717792	0.718382	0.715703	0.713758	0.707309	0.705899	0.708334	0.709489
	Var	0.107325	0.0471493	0.0233353	0.0148858	0.00900182	0.0073636	0.00488156	0.00389378	0.00368812	0.0030428	0.00307044	0.0029222	0.00242602	0.0027312	0.00256799	0.0024309	0.00249857	0.00218532	0.00236038	0.00216056	0.00211322	0.00227936
	SD	0.327605	0.217139	0.152759	0.122007	0.0948779	0.0858114	0.0698682	0.0624002	0.0607299	0.0551615	0.0554115	0.0540574	0.0492546	0.0522609	0.0506753	0.0493042	0.0499857	0.0467474	0.0485838	0.0464818	0.0459697	0.0477427
Green shading indicates experimental calcium concentrations. These values are part of the evaluation of the fit (cost value)

## Sheet: Figure 7 - figure supplement 1
Figure 7 - figure supplement 1 B,D,E - source data
Simulation results, unpriming model, cooperativity 2
eEJC1	Extr. Ca2+ (mM)	0.75	1	1.25	1.5	1.75	2	2.5	3	3.5	4	4.5	5	5.5	6	6.5	7	7.5	8	8.5	9	9.5	10
	Average	20.2747	30.6879	40.445	48.268	54.8654	60.8713	69.7153	76.1329	80.7382	84.6947	87.7735	89.736	91.9603	93.7966	95.2567	96.5769	97.7658	98.3438	99.4263	99.9156	100.936	101.292
	Var	9.95335	14.3136	16.1546	17.0495	19.2013	18.8298	18.6998	18.6627	17.9839	17.3372	17.1381	17.5896	15.6524	15.3478	15.558	15.9158	14.0449	13.7708	14.5113	14.2271	14.3595	13.7181
	SD	3.15489	3.78334	4.01928	4.1291	4.38193	4.33933	4.32433	4.32004	4.24074	4.16379	4.13982	4.19399	3.95632	3.91763	3.94437	3.98946	3.74766	3.7109	3.80937	3.77188	3.7894	3.7038
PPR
	Average	1.62816	1.31889	1.1402	1.04542	0.976466	0.91995	0.859294	0.818044	0.793081	0.769701	0.754417	0.744197	0.734017	0.725308	0.720467	0.711326	0.706411	0.705425	0.700341	0.697414	0.694947	0.695691
	Var	0.103613	0.041047	0.0223421	0.0158585	0.0122867	0.00907347	0.00689677	0.00561639	0.0051665	0.00435995	0.00414852	0.00387237	0.0034676	0.00340914	0.00285171	0.00313939	0.00301762	0.00287847	0.00288322	0.00295966	0.00290879	0.00252
	SD	0.32189	0.202601	0.149473	0.125931	0.110845	0.0952548	0.0830468	0.0749426	0.0718784	0.06603	0.064409	0.0622284	0.0588863	0.0583878	0.0534014	0.0560303	0.0549329	0.0536514	0.0536957	0.0544028	0.0539332	0.0501996
Green shading indicates experimental calcium concentrations. These values are part of the evaluation of the fit (cost value)

## Sheet: Figure 7 - figure supplement 2
Figure 7 - figure supplement 2 D,F,H - souce data
Simulation results, site activation model
eEJC1	Extr. Ca2+ (mM)	0.75	1	1.25	1.5	1.75	2	2.5	3	3.5	4	4.5	5	5.5	6	6.5	7	7.5	8	8.5	9	9.5	10
	Average	17.2122	30.5497	42.8346	52.7655	59.812	65.641	73.289	79.0349	82.6572	85.3062	87.7206	89.5038	90.8447	91.9077	93.1952	94.351	94.6886	95.4981	96.1079	96.4503	97.0139	97.5361
	Var	8.3969	13.7897	16.6365	15.9844	17.4945	15.5063	16.1077	15.9708	15.7205	15.2953	13.9117	12.9032	13.2796	12.4199	14.3193	12.86	13.0892	14.3575	12.1691	11.2698	11.0907	11.5592
	SD	2.89774	3.71345	4.07879	3.99804	4.18264	3.93781	4.01344	3.99634	3.96491	3.91092	3.72983	3.5921	3.64411	3.52418	3.78409	3.58609	3.6179	3.78913	3.48843	3.35705	3.33027	3.39989
PPR
	Average	1.92726	1.318	1.04541	0.931064	0.864565	0.835579	0.793695	0.772763	0.77062	0.760083	0.751444	0.740005	0.749309	0.745562	0.738426	0.736364	0.739888	0.732513	0.733292	0.732203	0.730183	0.727473
	Var	0.140013	0.0342656	0.0167443	0.0101848	0.00707069	0.00546202	0.00462903	0.00360713	0.00420824	0.00358812	0.00322813	0.00314894	0.00281877	0.00306172	0.00300842	0.00280854	0.00289907	0.00298817	0.00284066	0.00245144	0.00255254	0.00262363
	SD	0.374183	0.18511	0.1294	0.10092	0.0840874	0.0739055	0.068037	0.0600594	0.064871	0.0599009	0.0568166	0.0561154	0.0530921	0.0553328	0.054849	0.0529956	0.053843	0.0546641	0.0532978	0.049512	0.0505227	0.0512214
Green shading indicates experimental calcium concentrations. These values are part of the evaluation of the fit (cost value)

## Sheet: Figure 7 - figure supplement 3
Figure 7 - figure supplement 3
Simulation results, unpriming model, variable ISIs
5 ms ISI
PPR	Extr. Ca2+ (mM)	0.75	1.5	3	6	10
	Average	1.06288	0.591977	0.405886	0.331578	0.31364
	Var	0.0685872	0.00996932	0.00372184	0.00369695	0.00417651
	SD	0.261892	0.0998465	0.0610069	0.0608025	0.0646259
10 ms ISI
PPR	Extr. Ca2+ (mM)	0.75	1.5	3	6	10
	Average	1.66939	1.04818	0.771665	0.725521	0.709677
	Var	0.0974676	0.0140104	0.00348486	0.00256899	0.0025313
	SD	0.312198	0.118366	0.0590327	0.0506852	0.050312
25 ms ISI
PPR	Extr. Ca2+ (mM)	0.75	1.5	3	6	10
	Average	2.18551	1.39059	1.05997	1.00808	0.995835
	Var	0.12791	0.0152058	0.00286853	0.00200983	0.00148078
	SD	0.357645	0.123312	0.0535586	0.0448311	0.038481
50 ms ISI
PPR	Extr. Ca2+ (mM)	0.75	1.5	3	6	10
	Average	2.16372	1.40368	1.08846	1.03434	1.02298
	Var	0.114311	0.0165864	0.00322718	0.00174672	0.00134709
	SD	0.338099	0.128788	0.0568082	0.0417938	0.0367028
100 ms ISI
PPR	Extr. Ca2+ (mM)	0.75	1.5	3	6	10
	Average	2.19999	1.40183	1.09574	1.02881	1.02119
	Var	0.124222	0.0139834	0.00308283	0.00164557	0.0013199
	SD	0.352451	0.118252	0.0555233	0.0405656	0.0363304
250 ms ISI
PPR	Extr. Ca2+ (mM)	0.75	1.5	3	6	10
	Average	1.65997	1.3501	1.07611	1.0248	1.01205
	Var	0.0867007	0.0138191	0.00300857	0.00190967	0.00121028
	SD	0.29445	0.117555	0.0548504	0.0436998	0.0347891
500 ms ISI
PPR	Extr. Ca2+ (mM)	0.75	1.5	3	6	10
	Average	1.07551	1.07634	1.02564	1.01131	1.00349
	Var	0.0351957	0.0110058	0.00318184	0.00178965	0.00131325
	SD	0.187605	0.104908	0.0564078	0.0423043	0.0362388
1000 ms ISI
PPR	Extr. Ca2+ (mM)	0.75	1.5	3	6	10
	Average	1.02651	1.00796	1.0053	0.995024	0.995163
	Var	0.0422924	0.0110804	0.00318117	0.00166034	0.00117251
	SD	0.205651	0.105264	0.0564019	0.0407473	0.0342419
