# Supplementary figures and images for: Rapid regulation of vesicle priming explains synaptic facilitation despite heterogeneous vesicle:Ca2+ channel distances
Source: eLife journal article supplement (doi:10.7554/elife.51032), 2020-02-20

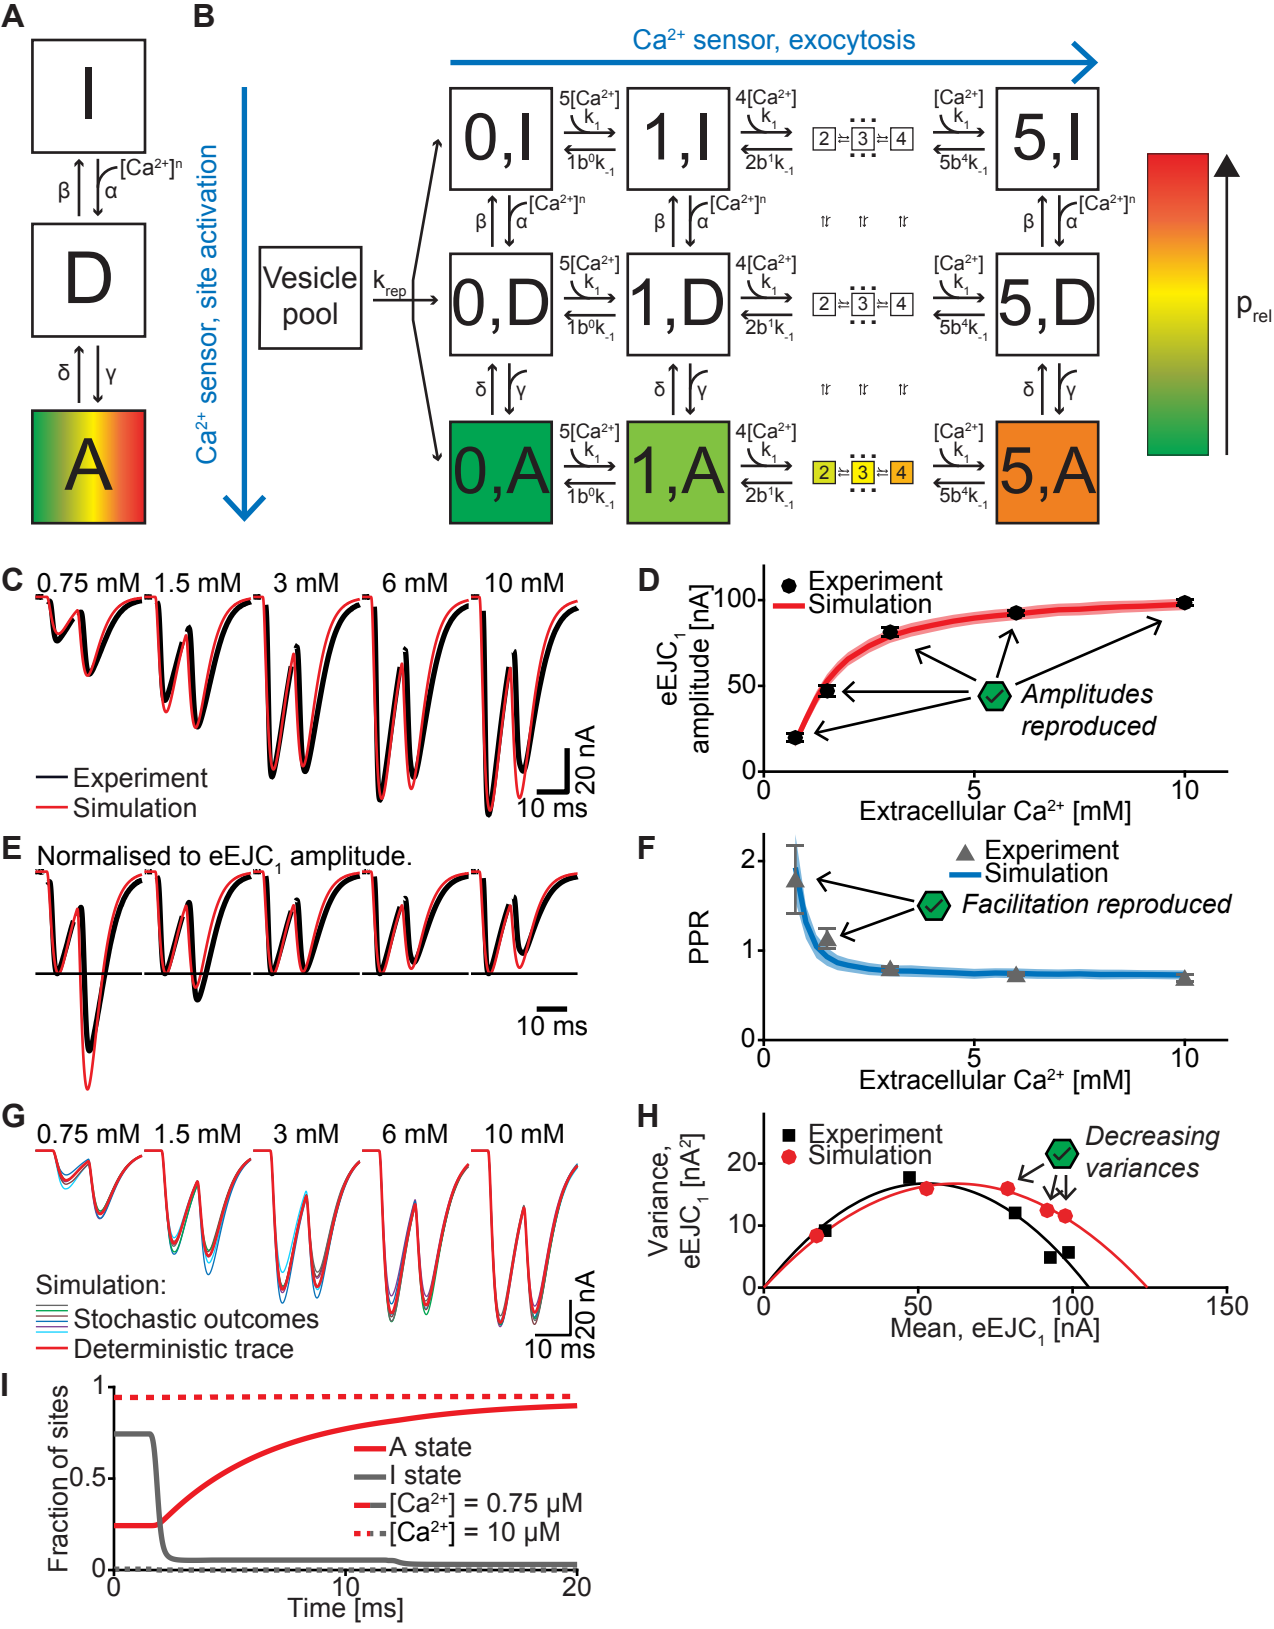

Supplement: supp [file elife-51032-supp-v1.zip]

A

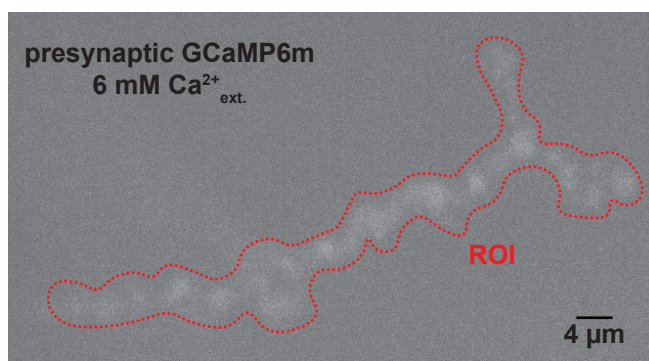

B

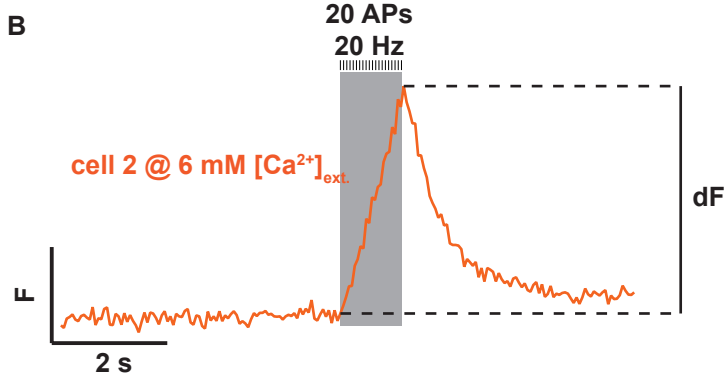

C

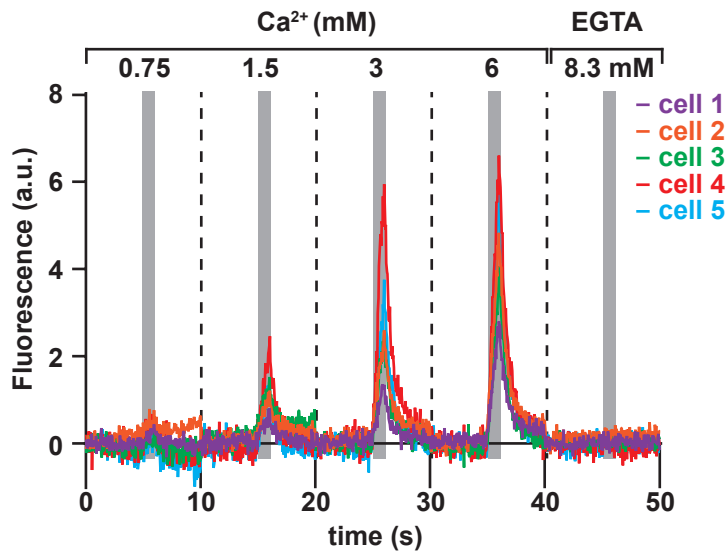

D

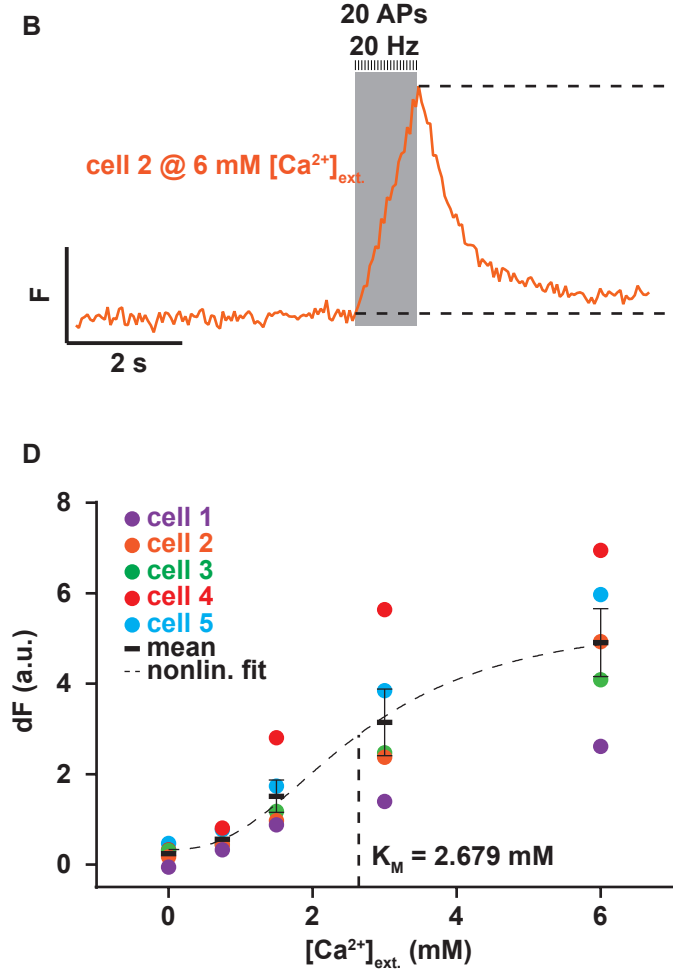

Supplement: supp [file elife-51032-supp-v1.zip]

# A Extracellular $\text{Ca}^{2+}$ -concentration

0.75 mM 1.5 mM 3 mM 6 mM 10 mM

— single sweep  
— average trace

10 ms  
20 nA

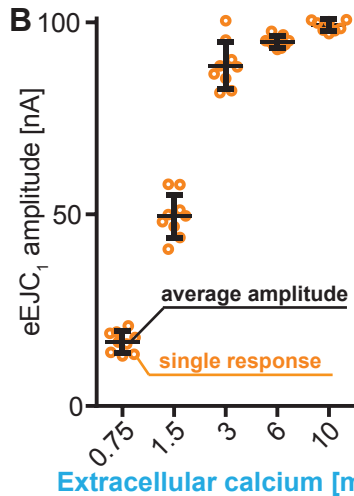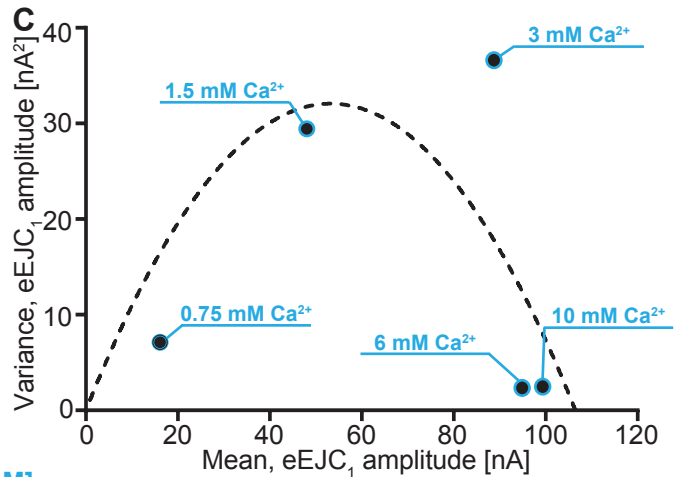

Supplement: supp [file elife-51032-supp-v1.zip]

# Unpriming model, cooperativity 2

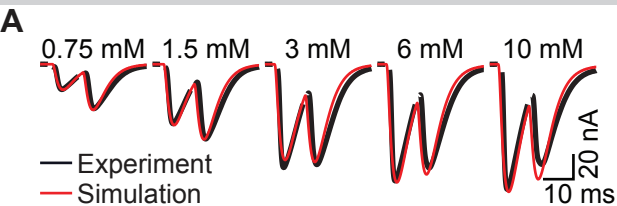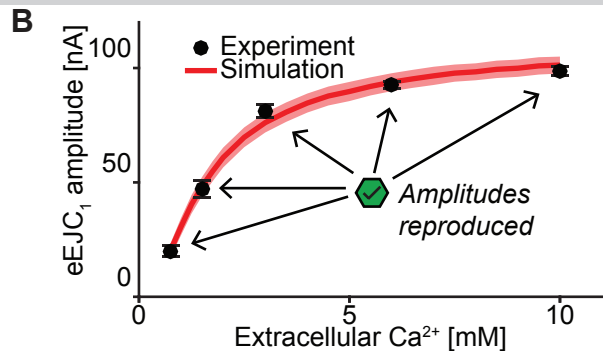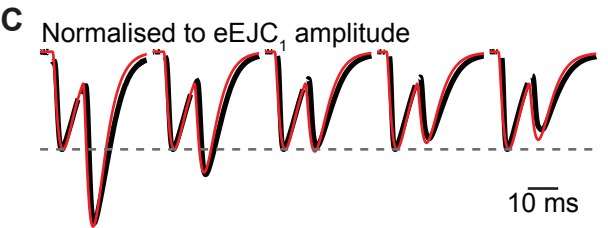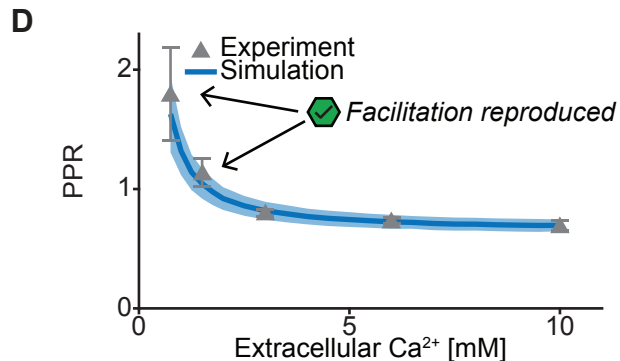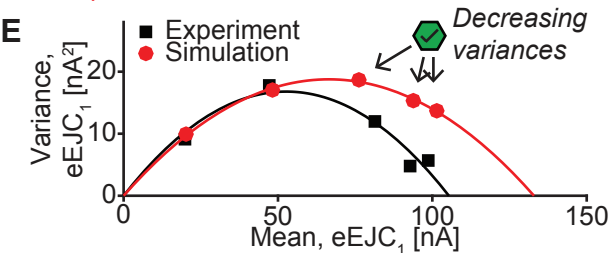

Supplement: supp [file elife-51032-supp-v1.zip]

# Dual fusion-sensor model, cooperativity 5

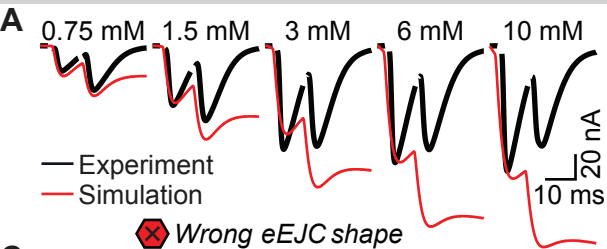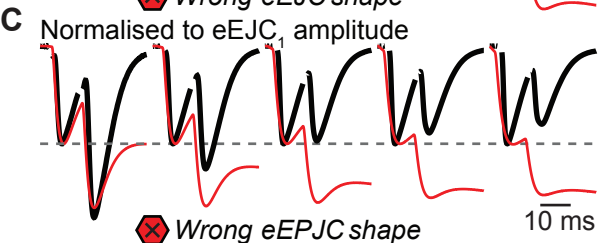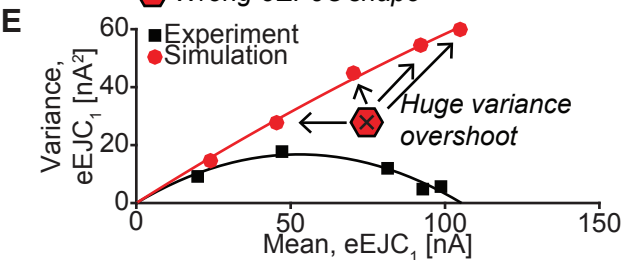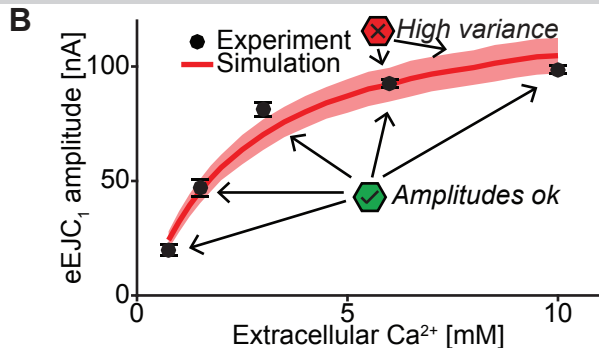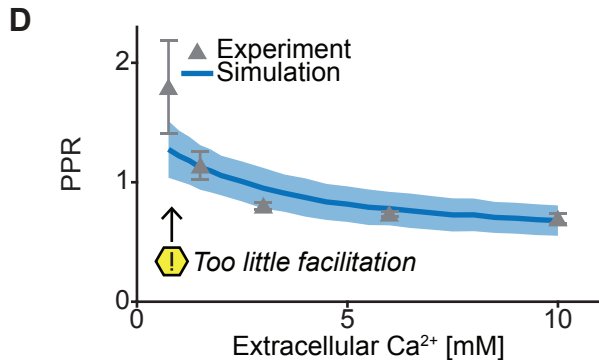

Supplement: supp [file elife-51032-supp-v1.zip]

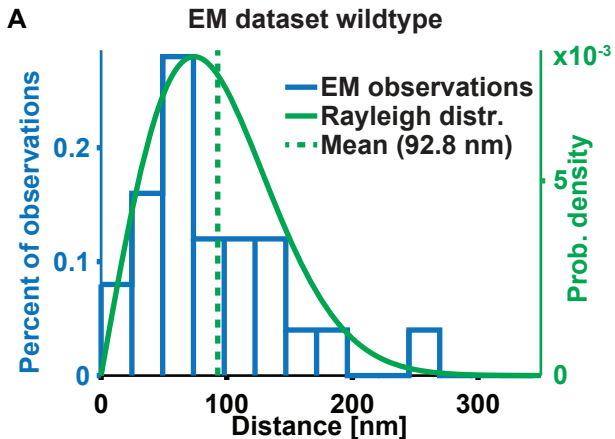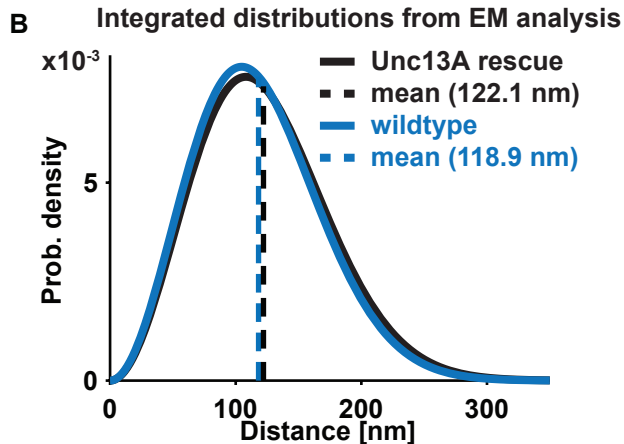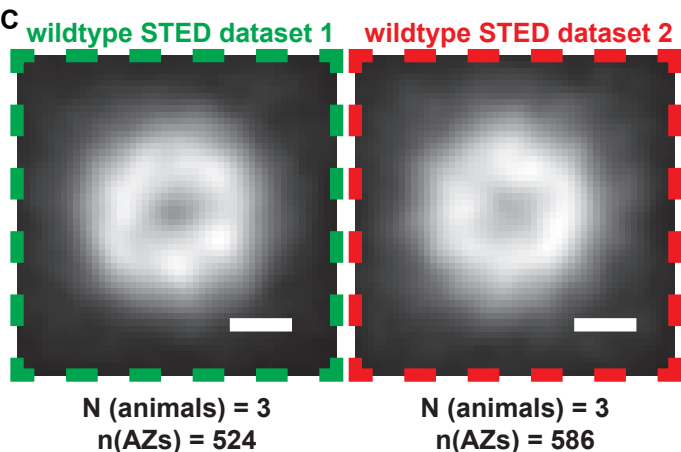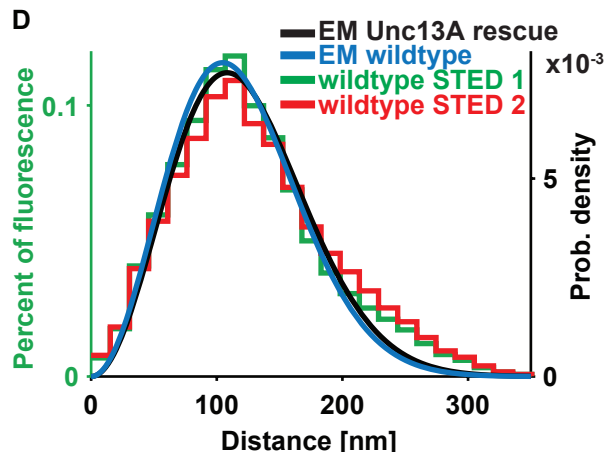

Supplement: supp [file elife-51032-supp-v1.zip]
